# Supplementary material for: Establishment of a lncRNA-Based Prognostic Gene Signature Associated With Altered Immune Responses in HCC
Source: PubMed Central journal article supplement (PMC9097819; doi:10.3389/fimmu.2022.880288), 2022-04-28
Supplement: DataSheet_1.pdf [file DataSheet_1.pdf]

## Supplementary Material

### 1 Supplementary Figures and Tables

#### 1.1 Supplementary Figures

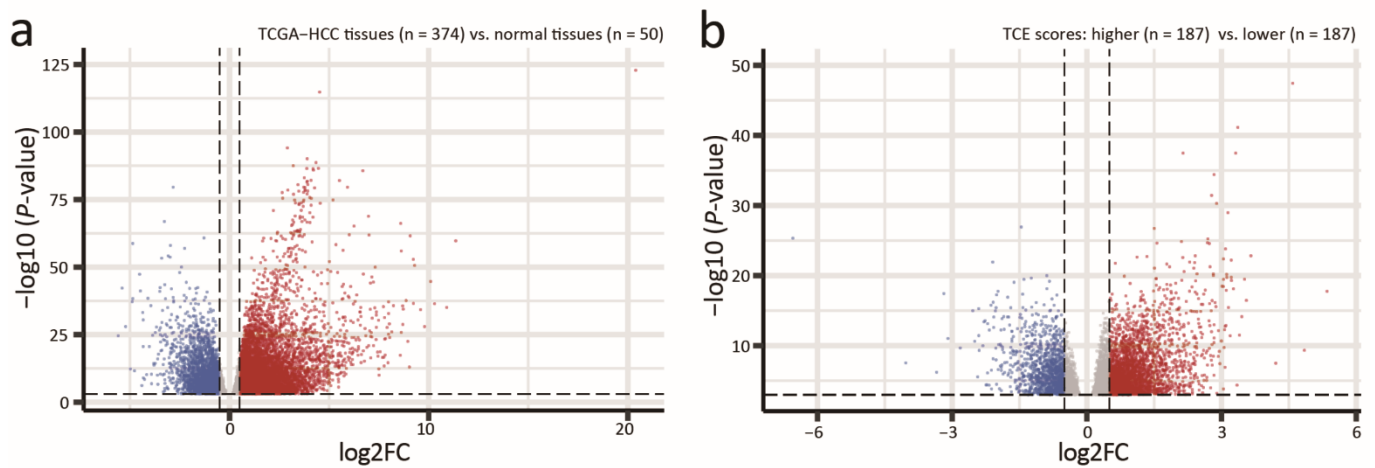

**Figure S1.** Genes differentially expressed between HCC and normal liver tissues (**a**) and between HCCs with higher and lower T cell exclusion levels (**b**), as shown in volcano plots. The X-axis represents  $\log_2FC$  and the Y-axis represents  $-\log_{10}$  (adjusted  $P$ -value).

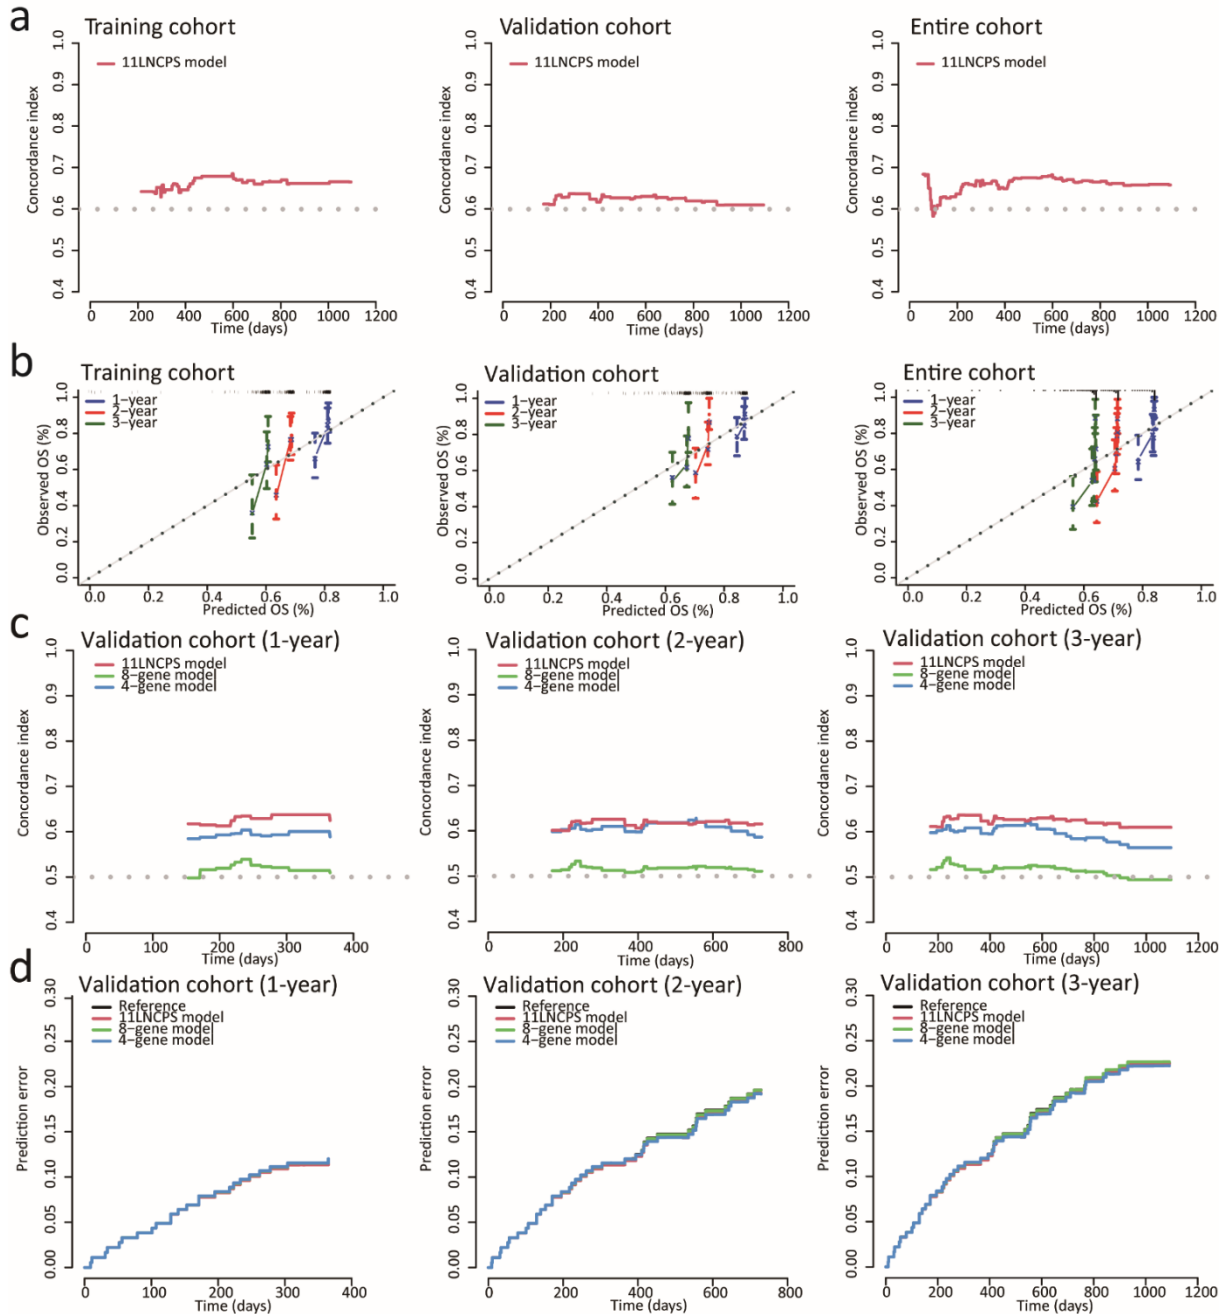

**Figure S2. Validation of the 11LNCPS model by different approaches.** (a) Prediction of the concordance index (C-index) curves of 3-year overall survival (OS) by the 11LNCPS model in the training cohort (left), validation cohort (middle), or entire cohort (right). (b) Calibration curves of the 11LNCPS model for predicting the OS probability at 1, 2, and 3 years in the training cohort (left), validation cohort (center), and entire cohort (right). (c) Comparison of C-index curves of 1, 2, and 3-year OS predicted by the 11LNCPS model and two previously published models in the validation cohort. (d) Comparison of prediction error curves of 1, 2, and 3-year OS predicted by the 11LNCPS model and two previously published models in the validation cohort.

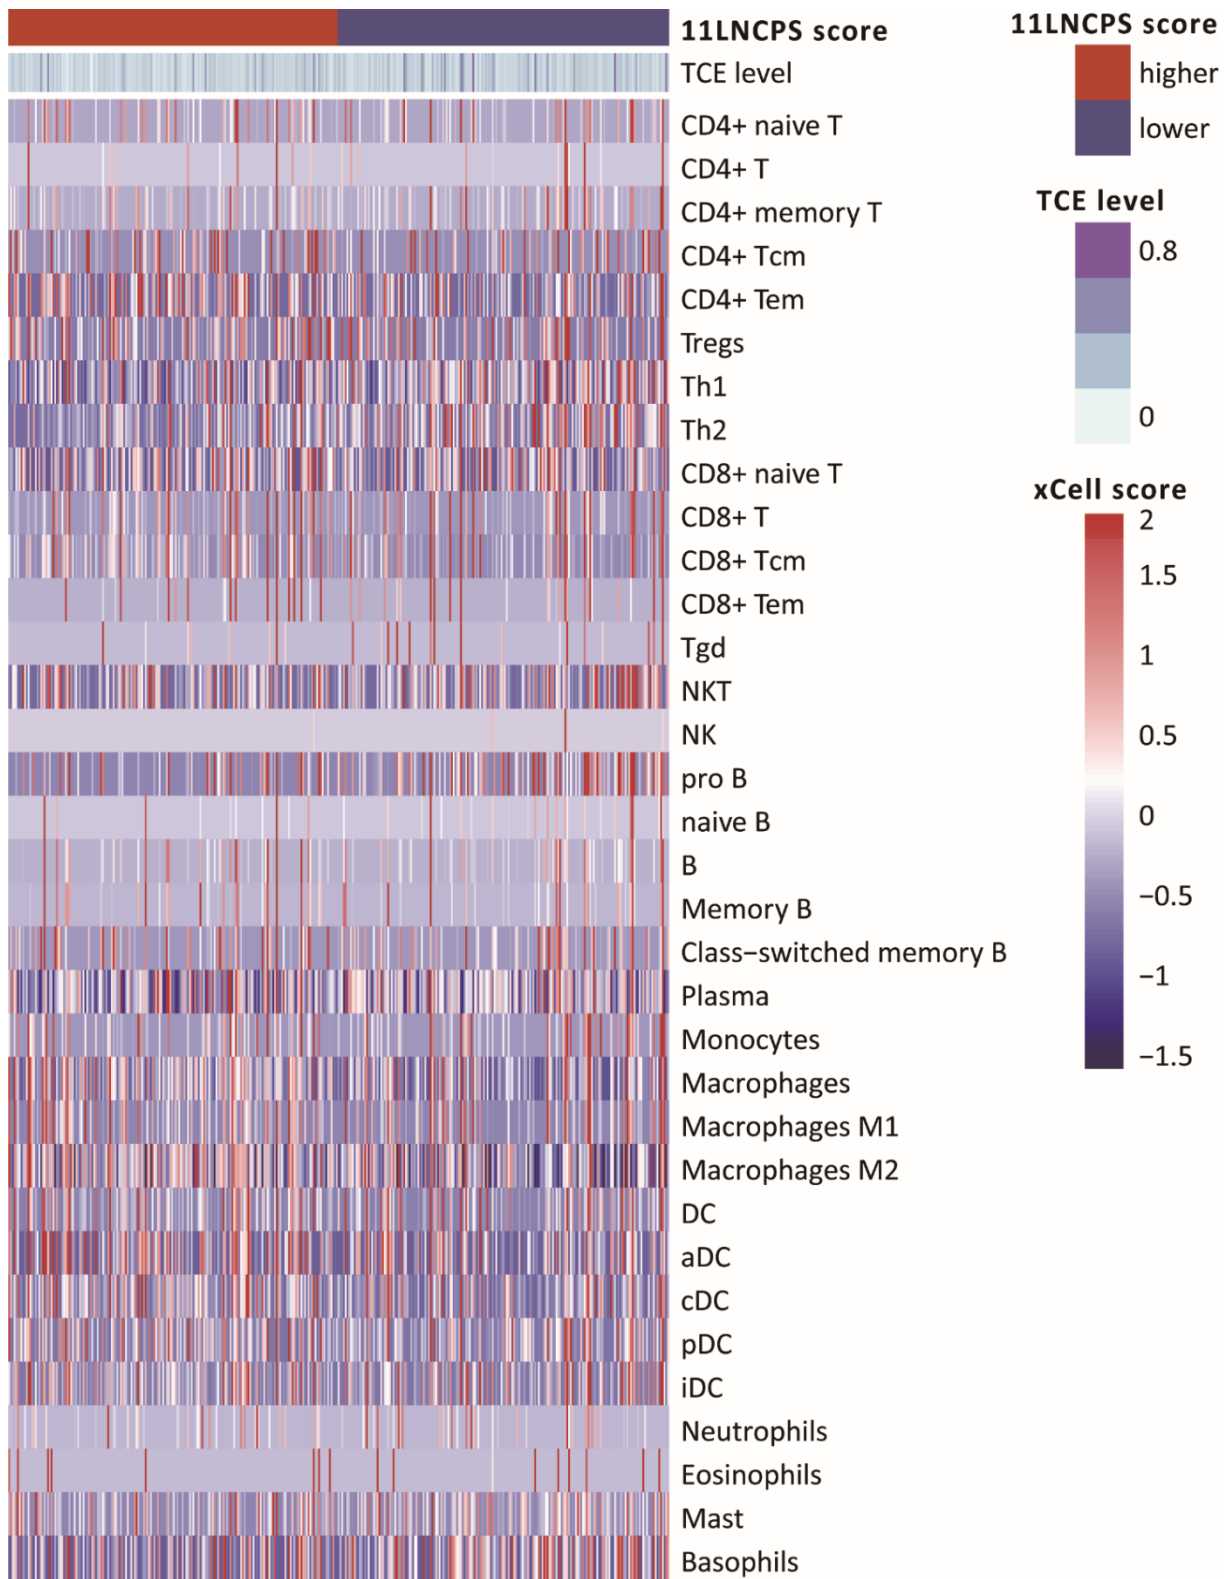

**Figure S3. Comparison of infiltration status of 34 types of immune cells between HCCs with higher and lower 11LNCPS scores.** The abundance of each immune cell type was estimated by the xCell assay and is shown in xCell scores and visualized in a heatmap. TCE scores are also shown, and their levels are indicated by gradient color bars at right.

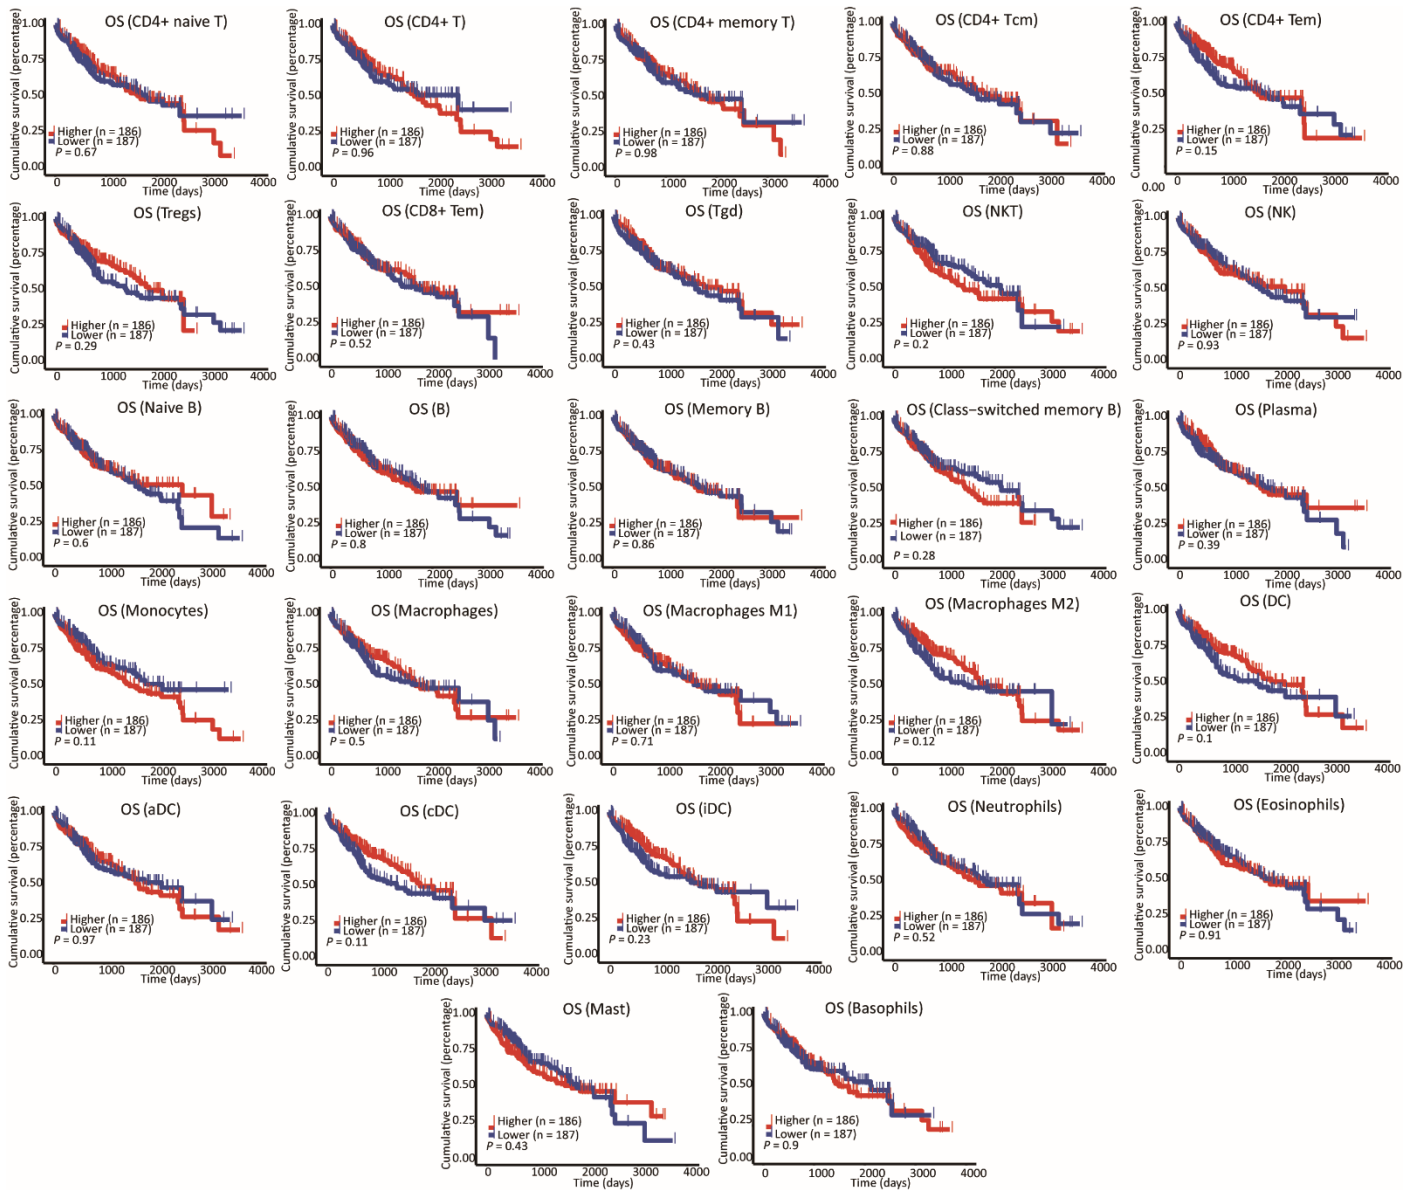

**Figure S4. Types of immune cells whose infiltration did not correlate with patient overall survival (OS) in HCC.** The Kaplan-Meier analysis was used to determine the correlation.

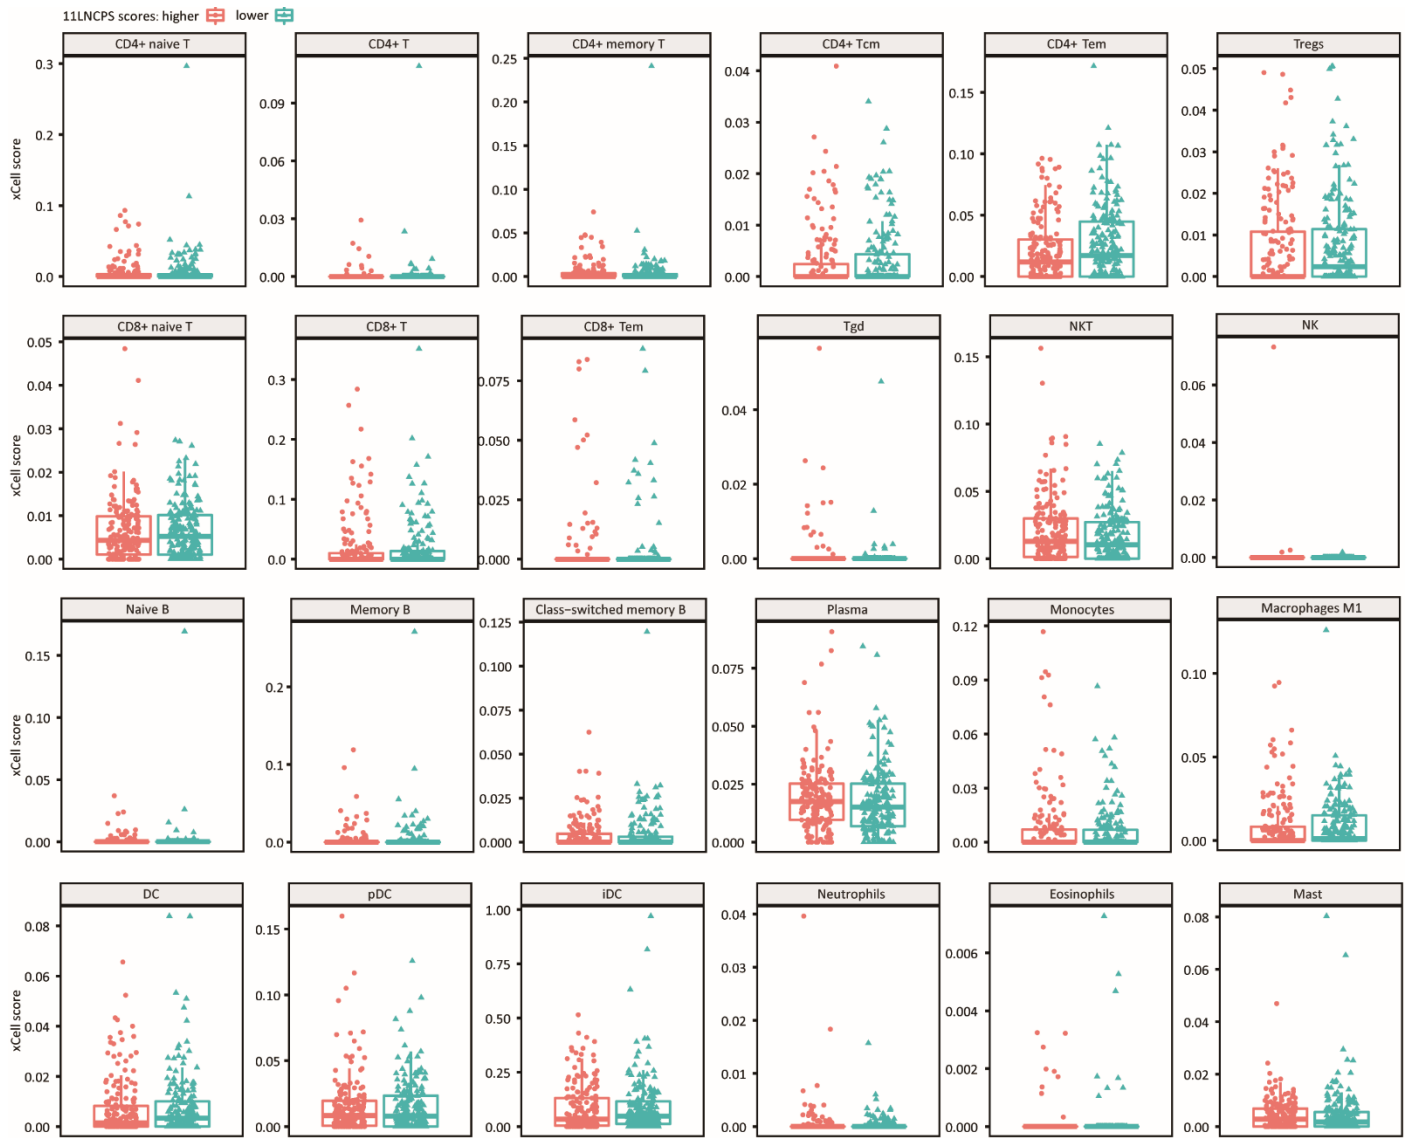

**Figure S5. Types of immune cells whose infiltration level did not differ between HCCs with higher 11LNCPS scores and those with lower scores. The Wilcoxon test was used for the analysis.**

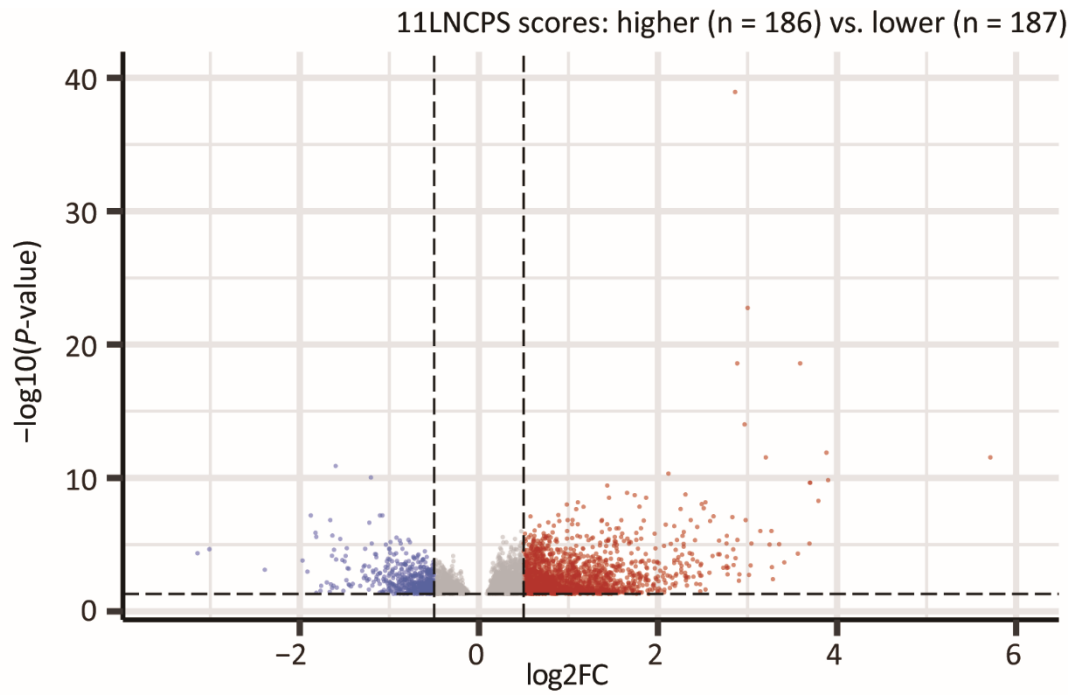

**Figure S6. Volcano plot of differentially expressed genes between HCCs with higher and lower 11LNCPS scores.** X-axis represents log<sub>2</sub>FC and the Y-axis represents -log<sub>10</sub> (adjusted *P*-value).

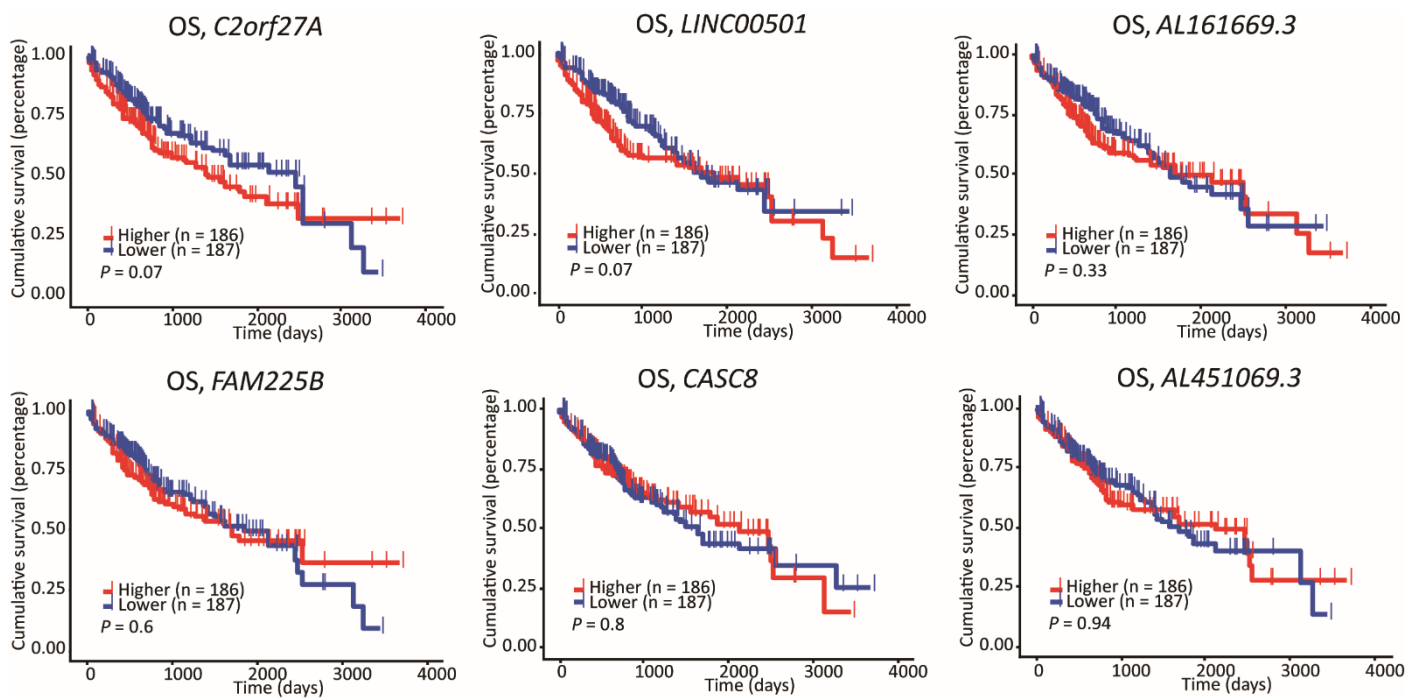

**Figure S7. LncRNAs of the 11LNCPS that do not have a significant correlation with overall survival (OS) in HCC.** Kaplan-Meier survival analysis was used for the determination.

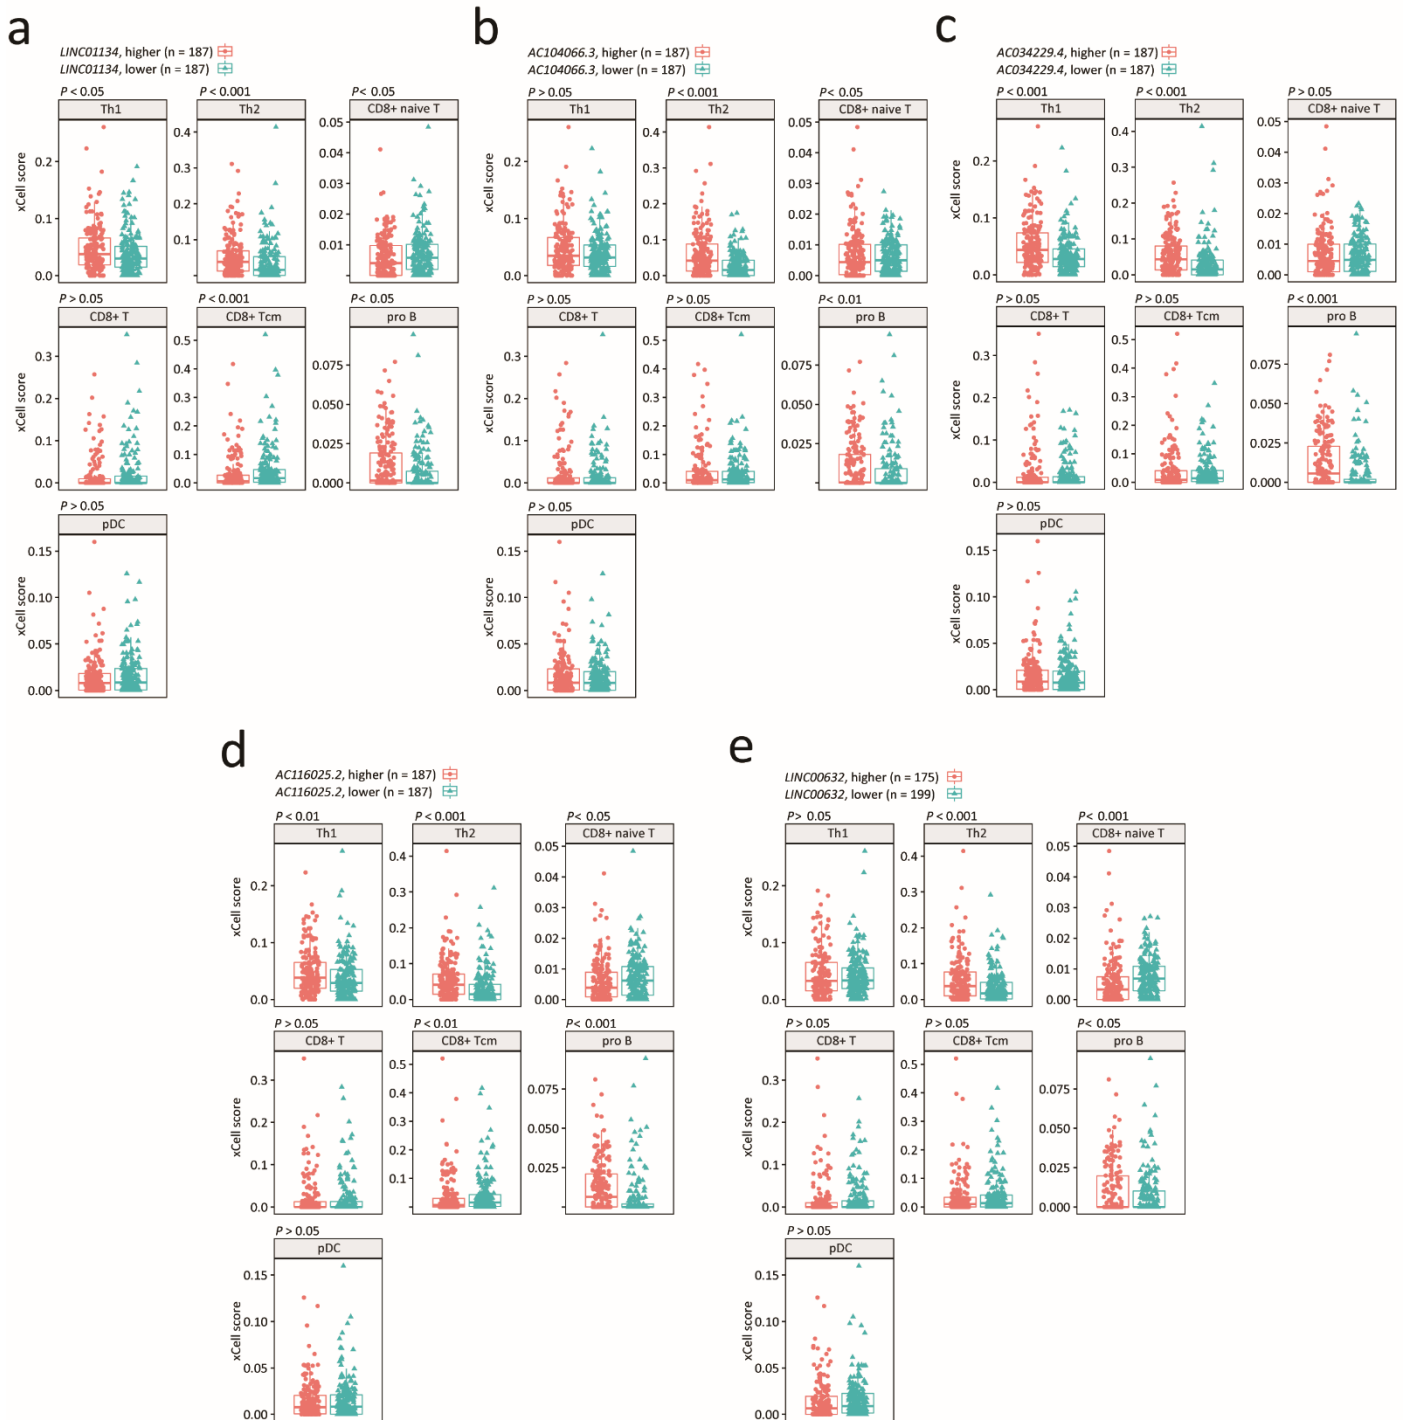

**Figure S8. Comparison of infiltration levels of prognosis-associated immune cell types between HCCs with higher and lower expression levels of a prognosis-associated 11LNCPS lncRNA.** The Wilcoxon test was used to compare, and the results are shown in box plots. The prognosis-associated 11LNCPS lncRNAs include *LINC01134* (a), *AC104066.3* (b), *AC034229.4* (c), *AC116025.2* (d), and *LINC00632* (e). The infiltration levels are indicated by xCell scores. HCCs were divided into higher and lower groups for each lncRNA using its median expression level.



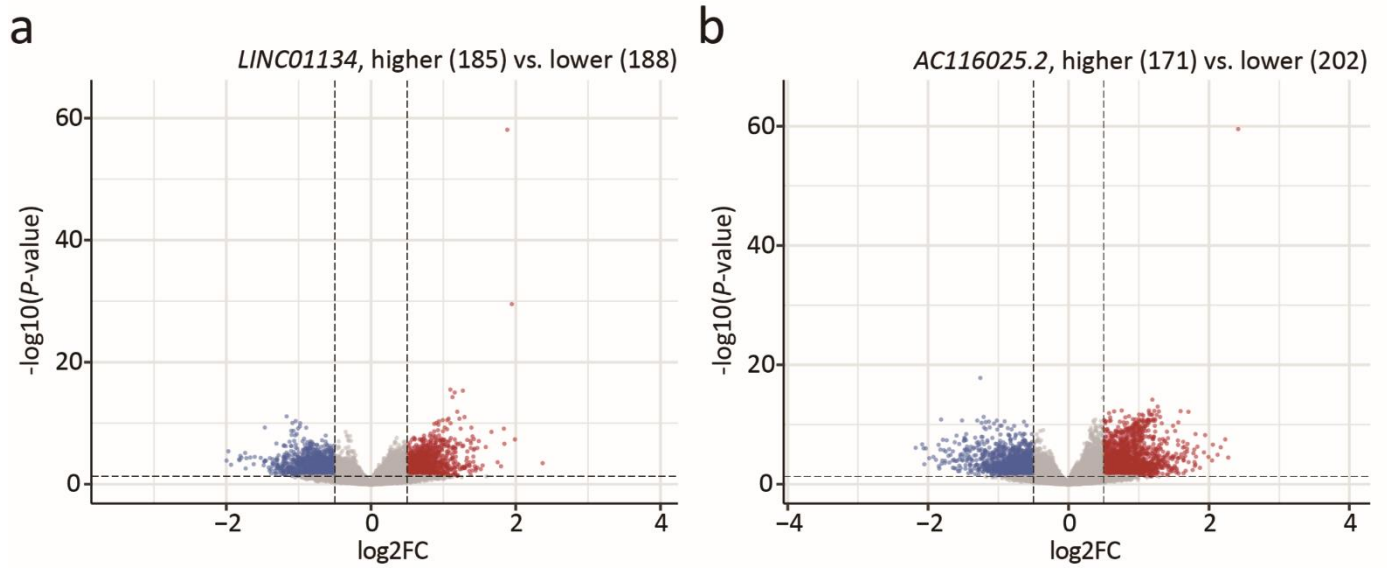

**Figure S9. Volcano plots of differentially expressed genes between HCCs with higher and lower *LINC01134* or *AC116025.2*.** The X-axis represents  $\log_2FC$  and the Y-axis represents  $-\log_{10}$  (adjusted *P*-value).

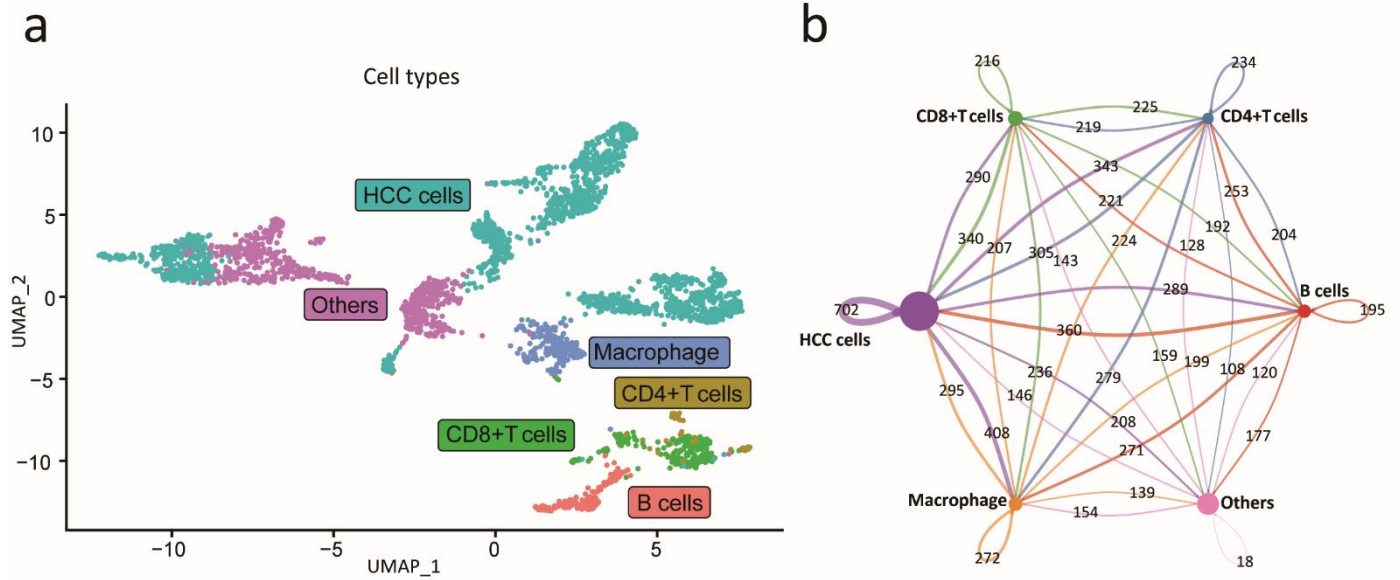

**Figure S10. Heterotypic signaling crosstalk between HCC cells and immune cells estimated by single-cell RNA sequencing analysis.** (a) Identification of cancer and immune cell types by single-cell sequencing analysis of HCCs, as shown in the UMAP plot. (b) Cell-cell communication network among cancer and immune cell types identified in panel A, as established by the CellChat analysis. In the circle plot, each line indicates crosstalk between two cell types based on a ligand-receptor interaction, and the number on a line indicates the number of ligand-receptor pairs.

## 1.2 Supplementary table

**Table S1. LncRNAs that are differentially expressed and TCE-associated in HCCs (n = 336).** Shown for each lncRNA include gene symbol, ENSEMBL ID, chromosomal location (Chr.), sequence position in a chromosome (start and end), hazard ratio (HR) for survival and its 95% confidence interval from low to high (HR.95L-HR.95H) expression fold change in log2 and its adjusted *P* value, and TCE fold change in log2 and its adjusted *P* value. Asterisks indicate the 54 lncRNAs whose expression alterations were significantly associated with overall survival in the training cohort.

| SYMBOL             | ENSEMBL ID      | Chr | Start         | End           | HR           | HR.95L-HR.95H           | <i>P</i> value | Expression fold change | <i>P</i> value | TCE fold change | <i>P</i> value |
|--------------------|-----------------|-----|---------------|---------------|--------------|-------------------------|----------------|------------------------|----------------|-----------------|----------------|
| <i>LINC02593</i>   | ENSG00000223764 | 1   | 916865        | 921016        | 0.31669<br>4 | 0.055174436-1.817784769 | 0.197168<br>1  | -<br>1.6356429         | 1.17E-06       | 0.94219         | 0.00025<br>9   |
| <i>AL645608.7</i>  | ENSG00000272512 | 1   | 995966        | 998051        | 0.99254<br>5 | 0.82096842-1.199979372  | 0.938401<br>2  | 0.9074497<br>1         | 0.00063<br>6   | 1.23612<br>8    | 2.78E-12       |
| <i>LINC01134*</i>  | ENSG00000236423 | 1   | 3900352       | 3917225       | 2.95709<br>9 | 1.490261982-5.8677175   | 0.001928<br>4  | 1.2538463<br>9         | 3.36E-12       | 0.55616<br>4    | 1.83E-05       |
| <i>LINC02766</i>   | ENSG00000229484 | 1   | 12527724      | 12528420      | 0.90335<br>1 | 0.699379724-1.166808772 | 0.436301<br>5  | -<br>0.8638034         | 8.00E-05       | -<br>0.76884    | 1.48E-06       |
| <i>AL121992.3</i>  | ENSG00000272510 | 1   | 15565611      | 15565956      | 1.0809       | 0.998277796-1.170360857 | 0.055177<br>2  | -0.771452              | 0.00013<br>1   | -<br>0.80305    | 1.58E-08       |
| <i>SNHG3*</i>      | ENSG00000242125 | 1   | 28505980      | 28510892      | 1.08035<br>3 | 1.024245347-1.139533346 | 0.004506<br>2  | 1.6735193<br>6         | 2.46E-21       | 0.84009         | 1.54E-11       |
| <i>AL357079.1*</i> | ENSG00000237950 | 1   | 43937918      | 43946551      | 1.87064      | 1.143125436-3.061165206 | 0.012692<br>4  | 1.4259950<br>2         | 5.45E-12       | 0.62387<br>2    | 2.80E-07       |
| <i>AL592166.1</i>  | ENSG00000225721 | 1   | 44759037      | 44775810      | 1.97512<br>4 | 0.649544515-6.005924198 | 0.230322<br>9  | 1.1441289<br>6         | 6.64E-08       | 0.54280<br>4    | 1.38E-05       |
| <i>LINC01389</i>   | ENSG00000225762 | 1   | 47380928      | 47408477      | 1.06031      | 0.849051567-1.32413227  | 0.605464<br>3  | 1.8929204              | 1.75E-15       | -<br>0.75632    | 2.43E-06       |
| <i>LINC01767</i>   | ENSG00000223956 | 1   | 56414935      | 56417137      | 0.99852<br>9 | 0.983602542-1.013682678 | 0.848121<br>3  | -<br>1.5757693         | 5.52E-11       | -<br>1.14866    | 1.38E-11       |
| <i>AL161740.1</i>  | ENSG00000236341 | 1   | 56963886      | 56996757      | 0.88021<br>4 | 0.541592462-1.430552138 | 0.606606<br>9  | -1.641166              | 5.81E-15       | -<br>0.64658    | 8.15E-05       |
| <i>LINC01702</i>   | ENSG00000235200 | 1   | 67522299      | 67532612      | 0.98926<br>7 | 0.972275419-1.006555031 | 0.222156<br>4  | -<br>1.4439763         | 2.39E-05       | -<br>1.08018    | 1.76E-05       |
| <i>AL583808.1</i>  | ENSG00000225087 | 1   | 72636547      | 72899240      | 1.27194<br>2 | 0.84603444-1.912257995  | 0.247569<br>2  | 3.3391966<br>5         | 2.49E-05       | 1.69858<br>8    | 0.00095<br>4   |
| <i>LINC00622</i>   | ENSG00000260941 | 1   | 11959770<br>2 | 11959927<br>1 | 1.36356      | 0.983028379-1.891396773 | 0.063249<br>3  | 1.5415678<br>6         | 8.45E-12       | 0.81551<br>9    | 2.80E-08       |
| <i>AL592494.1</i>  | ENSG00000228826 | 1   | 12149432<br>9 | 12151158<br>8 | 1.02947<br>3 | 0.973937159-1.088175256 | 0.304606       | -<br>0.8369263         | 0.00017<br>2   | -<br>0.90382    | 9.96E-09       |

## Supplementary Material

|                        |                     |   |               |               |              |                             |               |                |              |              |              |
|------------------------|---------------------|---|---------------|---------------|--------------|-----------------------------|---------------|----------------|--------------|--------------|--------------|
| <i>LINC02802*</i>      | ENSG000002325<br>27 | 1 | 14422702<br>9 | 14425032<br>6 | 1.78599<br>9 | 1.278897676-<br>2.494173334 | 0.000665      | 2.4350251<br>9 | 5.99E-<br>14 | 0.86951<br>3 | 2.55E-<br>05 |
| <i>AL356356.1</i><br>* | ENSG000002377<br>81 | 1 | 15054856<br>2 | 15055772<br>4 | 1.18038<br>2 | 1.010292802-<br>1.379107934 | 0.036712      | 1.5920240<br>4 | 1.91E-<br>08 | 0.57952<br>4 | 0.00025<br>2 |
| <i>AL355388.1</i>      | ENSG000002242<br>76 | 1 | 15599139<br>0 | 15600178<br>7 | 3.58116<br>6 | 0.912334442-<br>14.05707034 | 0.067480<br>6 | 2.5465570<br>6 | 1.26E-<br>16 | 0.73826<br>5 | 5.63E-<br>05 |
| <i>SNHG28</i>          | ENSG000001880<br>04 | 1 | 15983449<br>5 | 15985523<br>7 | 1.00548<br>9 | 0.297047169-<br>3.403528222 | 0.992979<br>4 | 1.2671709<br>3 | 9.22E-<br>07 | 0.73900<br>7 | 2.90E-<br>05 |
| <i>AL590560.3</i>      | ENSG000002726<br>68 | 1 | 15985487<br>0 | 15986768<br>5 | 1.16816<br>3 | 0.736262128-<br>1.853422269 | 0.509274<br>8 | 1.0357152<br>9 | 0.00085<br>1 | 0.93555<br>3 | 4.05E-<br>06 |
| <i>LINC00862</i>       | ENSG000002037<br>21 | 1 | 20025341<br>9 | 20040070<br>5 | 1.16702<br>3 | 0.728979746-<br>1.868286277 | 0.520010<br>6 | 1.6456133<br>6 | 3.03E-<br>11 | 0.59392<br>1 | 0.00080<br>3 |
| <i>AL358473.1</i>      | ENSG000002291<br>91 | 1 | 20102394<br>9 | 20102879<br>2 | 242.628<br>9 | 0.196410052-<br>299723.9922 | 0.130564<br>2 | 2.5038162<br>6 | 2.15E-<br>08 | 1.20057<br>1 | 1.78E-<br>06 |
| <i>AL391832.1</i>      | ENSG000002375<br>20 | 1 | 23495723<br>1 | 23495998<br>9 | 0.93732<br>2 | 0.783115257-<br>1.121894449 | 0.480313<br>5 | 2.4111612<br>5 | 5.80E-<br>12 | -<br>0.93983 | 5.60E-<br>05 |
| <i>LINC01348</i>       | ENSG000002805<br>87 | 1 | 23506547<br>9 | 23507422<br>0 | 1.01518<br>3 | 0.969429362-<br>1.063096491 | 0.521888<br>4 | -<br>1.1609267 | 5.34E-<br>05 | -<br>1.33613 | 4.06E-<br>11 |
| <i>AC114810.1</i>      | ENSG000002718<br>68 | 2 | 3496956       | 3497428       | 0.94738<br>2 | 0.814223435-<br>1.102317659 | 0.484281<br>6 | -<br>0.8760405 | 4.70E-<br>07 | -<br>0.59407 | 2.73E-<br>06 |
| <i>U91324.1</i>        | ENSG000002297<br>40 | 2 | 8139335       | 8144950       | 1.02384<br>2 | 0.940355436-<br>1.114739941 | 0.587184<br>1 | -<br>1.2856383 | 1.91E-<br>08 | -<br>0.79493 | 2.75E-<br>06 |
| <i>AC010969.1</i>      | ENSG000001885<br>25 | 2 | 10001757      | 10006030      | 1.08879<br>6 | 0.859907482-<br>1.378608816 | 0.479870<br>5 | -<br>1.8967632 | 9.03E-<br>06 | -<br>1.09101 | 0.00038      |
| <i>AC115619.1</i>      | ENSG000002610<br>12 | 2 | 20999313      | 21000917      | 1.00021<br>9 | 0.986575642-<br>1.014051801 | 0.975028<br>3 | -<br>1.0568876 | 3.21E-<br>07 | -1.1284      | 2.70E-<br>15 |
| <i>AC018467.1</i>      | ENSG000002324<br>51 | 2 | 23018125      | 23199056      | 0.96216<br>3 | 0.795036963-<br>1.16442112  | 0.691937<br>3 | -<br>1.0434734 | 8.33E-<br>05 | -<br>0.82785 | 2.36E-<br>05 |
| <i>AC104695.2</i>      | ENSG000002299<br>51 | 2 | 28384409      | 28394672      | 0.37023<br>4 | 0.028569086-<br>4.797964137 | 0.447142<br>2 | 1.6925281<br>5 | 3.21E-<br>06 | 0.79752      | 0.00081<br>2 |
| <i>AC073283.2</i>      | ENSG000002260<br>87 | 2 | 47225781      | 47240886      | 1.05395<br>2 | 0.878778636-<br>1.264042772 | 0.570989<br>7 | 1.5505157<br>7 | 0.00057      | -<br>1.43863 | 3.81E-<br>06 |
| <i>AC007099.1</i>      | ENSG000002311<br>72 | 2 | 75524068      | 75542706      | 1.01203<br>3 | 0.987246813-<br>1.037441683 | 0.344432<br>5 | 3.1477330<br>3 | 2.65E-<br>10 | 1.84318<br>8 | 3.61E-<br>09 |
| <i>AC092683.1</i><br>* | ENSG000002306<br>06 | 2 | 97416165      | 97433527      | 70.7485<br>3 | 1.311361912-<br>3816.913004 | 0.036333      | 1.8631982<br>7 | 2.94E-<br>10 | 0.75595<br>7 | 8.33E-<br>06 |
| <i>C2orf27A*</i>       | ENSG000002871<br>51 | 2 | 13164799<br>0 | 13176740<br>4 | 1.71325<br>2 | 1.301972612-<br>2.25444941  | 0.000121      | 1.1616607<br>1 | 9.60E-<br>08 | 1.05624<br>6 | 6.00E-<br>13 |

|                    |                 |   |           |           |          |                         |           |            |          |          |          |
|--------------------|-----------------|---|-----------|-----------|----------|-------------------------|-----------|------------|----------|----------|----------|
| <i>LINC01818</i>   | ENSG00000230645 | 2 | 150169474 | 150356460 | 0.827751 | 0.305588794-2.242135036 | 0.7100196 | -2.6000263 | 8.27E-12 | -1.0926  | 0.000713 |
| <i>LINC02612</i>   | ENSG00000224048 | 2 | 150612381 | 150635818 | 3.100306 | 0.00148868-6456.654095  | 0.7716456 | -1.3415325 | 0.000214 | -1.32966 | 2.14E-06 |
| <i>AC007277.1</i>  | ENSG00000213981 | 2 | 170640374 | 170695374 | 0.544634 | 0.201945599-1.46884407  | 0.2299773 | 3.67814814 | 8.68E-16 | 1.371244 | 1.97E-06 |
| <i>LINC01116</i>   | ENSG00000163364 | 2 | 176629572 | 176637931 | 1.287684 | 0.992598625-1.670494074 | 0.0569074 | 3.10351045 | 3.25E-22 | 1.020994 | 1.77E-06 |
| <i>AC005540.1</i>  | ENSG00000235852 | 2 | 190880797 | 190882059 | 1.041239 | 0.010572109-102.5507637 | 0.9862324 | 1.25953823 | 0.000765 | 0.727555 | 0.000689 |
| <i>AC097717.1</i>  | ENSG00000232732 | 2 | 199867396 | 199911159 | 1675.204 | 0.003602542-778979770.4 | 0.2648625 | 1.5260865  | 3.11E-05 | 0.678658 | 0.000852 |
| <i>AC098820.2</i>  | ENSG00000235042 | 2 | 216385288 | 216412696 | 1.773667 | 0.934495067-3.366409528 | 0.0796458 | 1.47253112 | 3.66E-15 | 0.512669 | 6.03E-05 |
| <i>AC016717.2</i>  | ENSG00000273301 | 2 | 225698514 | 225703654 | 0.786779 | 0.415291176-1.490572718 | 0.4619844 | 4.96428288 | 1.88E-10 | 2.426174 | 1.01E-06 |
| <i>AC009407.1*</i> | ENSG00000261829 | 2 | 231052040 | 231052637 | 1.027885 | 1.005407635-1.050865304 | 0.0147676 | 0.81960217 | 5.17E-05 | -0.55738 | 0.000183 |
| <i>AC104809.1</i>  | ENSG00000223991 | 2 | 240981515 | 240986072 | 1.000135 | 0.942405771-1.061400655 | 0.9964482 | -2.3499808 | 5.98E-06 | -1.97353 | 2.48E-07 |
| <i>AC006252.1*</i> | ENSG00000243224 | 3 | 52239258  | 52241097  | 4.890076 | 1.117829024-21.39221464 | 0.0350402 | 2.02873971 | 2.22E-16 | 0.539802 | 6.36E-05 |
| <i>AC119424.1</i>  | ENSG00000243384 | 3 | 58572744  | 58574319  | 1.107275 | 0.783949436-1.563949594 | 0.5630036 | -1.7067544 | 4.64E-09 | -0.77731 | 0.000498 |
| <i>AC097634.1</i>  | ENSG00000270562 | 3 | 71584943  | 71587409  | 4.016383 | 0.093514806-172.5003204 | 0.4686012 | 1.77009717 | 1.56E-09 | 0.653731 | 0.000107 |
| <i>AC063938.1</i>  | ENSG00000241754 | 3 | 102621061 | 102673986 | 1.148793 | 0.50679176-2.604076912  | 0.7397306 | -1.661155  | 7.41E-10 | -0.84039 | 9.56E-05 |
| <i>LINC00488</i>   | ENSG00000214381 | 3 | 109178143 | 109216965 | 0.707382 | 0.374322063-1.336786484 | 0.2863877 | 3.43714611 | 2.89E-10 | 1.976464 | 1.19E-07 |
| <i>LINC00880</i>   | ENSG00000243629 | 3 | 157081667 | 157128595 | 0.763723 | 0.411559751-1.417223338 | 0.3928147 | 1.90812631 | 1.07E-08 | -0.90082 | 0.000142 |
| <i>AC080013.3</i>  | ENSG00000271778 | 3 | 158782547 | 158783124 | 3.165136 | 0.934137312-10.72442208 | 0.0642361 | 1.61565018 | 7.77E-09 | 0.532467 | 0.000749 |
| <i>LINC00501*</i>  | ENSG00000203645 | 3 | 177294442 | 177323418 | 5.639399 | 2.471580449-12.86740252 | 3.96E-05  | 3.1162168  | 3.46E-09 | 1.392693 | 1.45E-05 |
| <i>LINC02028</i>   | ENSG00000230102 | 3 | 194005259 | 194071025 | 1.345676 | 0.623256752-2.905452582 | 0.4496351 | -0.7911291 | 0.000292 | -0.931   | 1.30E-09 |
| <i>LINC00887</i>   | ENSG00000214145 | 3 | 194296191 | 194322871 | 1.403048 | 0.945561831-2.081876825 | 0.0925787 | 1.51439067 | 3.53E-06 | 1.15212  | 1.74E-07 |

## Supplementary Material

|                    |                 |   |           |           |          |                         |           |            |          |          |          |
|--------------------|-----------------|---|-----------|-----------|----------|-------------------------|-----------|------------|----------|----------|----------|
| <i>AC024560.3</i>  | ENSG00000273308 | 3 | 197645669 | 197646017 | 1.521166 | 0.805179376-2.87382732  | 0.1962309 | 1.403065   | 1.25E-06 | 0.717006 | 1.23E-06 |
| <i>AC092535.5</i>  | ENSG00000273179 | 4 | 1167778   | 1168174   | 1.012822 | 0.990708629-1.035428583 | 0.2579865 | 1.91995596 | 9.94E-21 | 0.513973 | 0.000773 |
| <i>LINC02600</i>   | ENSG00000250986 | 4 | 3758748   | 3763390   | 0.92113  | 0.503490525-1.685194821 | 0.7897974 | 2.59798189 | 6.96E-12 | 1.371764 | 2.14E-07 |
| <i>AC005699.1</i>  | ENSG00000249631 | 4 | 11625714  | 11823906  | 4.203809 | 0.205167031-86.13473892 | 0.3513496 | 1.80297051 | 0.000404 | 1.239791 | 9.39E-05 |
| <i>AC104066.3*</i> | ENSG00000260120 | 4 | 52680609  | 52692999  | 7.467815 | 1.969993365-28.30885859 | 0.0031043 | 1.30910446 | 2.76E-05 | 1.028498 | 1.70E-08 |
| <i>DANCR*</i>      | ENSG00000226950 | 4 | 52712404  | 52720351  | 1.020597 | 1.00247452-1.03904799   | 0.0257259 | 0.73015913 | 6.80E-05 | 0.646968 | 8.21E-07 |
| <i>AC107396.1</i>  | ENSG00000251049 | 4 | 57595940  | 57605872  | 0.666353 | 0.164421618-2.700536778 | 0.5696626 | -          | 1.05E-09 | -        | 6.00E-07 |
| <i>LINC01094</i>   | ENSG00000251442 | 4 | 78638780  | 78683185  | 1.529855 | 0.859363327-2.72347792  | 0.1484873 | 0.8270101  | 0.000736 | 0.584443 | 0.00079  |
| <i>LINC01088</i>   | ENSG00000249307 | 4 | 78939485  | 79309673  | 2.878004 | 0.235863256-35.11741074 | 0.4075466 | 1.62248655 | 5.87E-05 | 1.039377 | 3.30E-05 |
| <i>AC114811.2</i>  | ENSG00000260641 | 4 | 98658904  | 98664550  | 0.018146 | 5.06E-05-6.50198711     | 0.18152   | 2.72815237 | 4.28E-09 | 1.233649 | 2.16E-05 |
| <i>AC083902.1</i>  | ENSG00000248676 | 4 | 99594799  | 99625913  | 1.072107 | 0.797857416-1.440625435 | 0.6441641 | -0.668058  | 0.000719 | -0.5497  | 0.000199 |
| <i>LINC02428</i>   | ENSG00000248740 | 4 | 103255822 | 103454667 | 1.029471 | 0.998351991-1.061560915 | 0.0636467 | -          | 2.67E-09 | -        | 6.37E-10 |
| <i>AC096564.1</i>  | ENSG00000245293 | 4 | 107863473 | 107989679 | 1.109764 | 0.025090088-49.08618803 | 0.957041  | -          | 4.68E-08 | -        | 8.10E-16 |
| <i>AC078850.1*</i> | ENSG00000248187 | 4 | 128567972 | 128570531 | 11.81261 | 1.628360623-85.69216461 | 0.0145974 | 2.39425337 | 2.80E-08 | 1.228353 | 2.84E-07 |
| <i>LINC02362</i>   | ENSG00000249096 | 4 | 184365180 | 184382416 | 0.938059 | 0.852377769-1.032352834 | 0.1907288 | -          | 1.21E-05 | -        | 1.82E-09 |
| <i>LINC01093</i>   | ENSG00000249173 | 4 | 184892858 | 184899553 | 1.010119 | 0.987283458-1.033481892 | 0.3881566 | -          | 6.15E-20 | -        | 5.67E-13 |
| <i>LINC01018</i>   | ENSG00000250056 | 5 | 6582136   | 6600288   | 0.9965   | 0.98289692-1.010291495  | 0.617112  | -          | 7.75E-05 | -        | 2.24E-05 |
| <i>AC034229.4*</i> | ENSG00000272417 | 5 | 10203600  | 10204040  | 1.903967 | 1.242231532-2.918207686 | 0.0031214 | 2.70508594 | 6.16E-16 | 0.569602 | 0.000575 |
| <i>AC010457.1</i>  | ENSG00000251257 | 5 | 38460925  | 38468339  | 1.108759 | 0.901452452-1.363738607 | 0.3282813 | 2.45205361 | 5.44E-06 | 1.977763 | 1.20E-09 |

|                        |                     |   |               |               |              |                             |               |                |              |              |              |
|------------------------|---------------------|---|---------------|---------------|--------------|-----------------------------|---------------|----------------|--------------|--------------|--------------|
| <i>LINC01948</i>       | ENSG000002487<br>27 | 5 | 56451627      | 56481946      | 0.79774<br>4 | 0.308038129-<br>2.065965753 | 0.641623<br>3 | 1.7567679<br>3 | 1.52E-<br>07 | 0.81997<br>9 | 0.00010<br>8 |
| <i>PART1</i>           | ENSG000001529<br>31 | 5 | 60487713      | 60548813      | 0.86577<br>9 | 0.560608668-<br>1.33707047  | 0.515712      | 5.9544364<br>4 | 2.00E-<br>17 | 2.99731<br>1 | 2.11E-<br>11 |
| <i>AC025176.1</i>      | ENSG000002500<br>81 | 5 | 65486444      | 65487048      | 1.86057<br>3 | 0.966993278-<br>3.579891962 | 0.062963<br>9 | 2.8821391<br>2 | 6.60E-<br>13 | 0.70675<br>9 | 0.00090<br>8 |
| <i>AC112206.2</i>      | ENSG000002493<br>64 | 5 | 67379378      | 67806600      | 0.91730<br>7 | 0.776961625-<br>1.083003852 | 0.308306<br>6 | -<br>1.5916661 | 7.63E-<br>06 | -<br>1.11847 | 2.11E-<br>05 |
| <i>AC010280.2</i>      | ENSG000002488<br>84 | 5 | 68430427      | 68434481      | 1.06547<br>8 | 0.901983687-<br>1.258607974 | 0.455530<br>9 | -<br>2.5940515 | 1.93E-<br>15 | -1.6367      | 4.97E-<br>12 |
| <i>LINC02200</i>       | ENSG000002503<br>58 | 5 | 11262843<br>6 | 11264248<br>3 | 1.01300<br>3 | 0.90094584-<br>1.138998564  | 0.828985      | 4.288762       | 4.29E-<br>08 | -<br>2.42972 | 2.75E-<br>06 |
| <i>C5orf66</i>         | ENSG000002241<br>86 | 5 | 13503328<br>0 | 13535821<br>9 | 0.81534<br>6 | 0.277373838-<br>2.396723999 | 0.710579<br>5 | 1.4813654<br>6 | 8.41E-<br>08 | 0.93585<br>6 | 2.11E-<br>06 |
| <i>AC113382.1</i>      | ENSG000002463<br>23 | 5 | 13803277<br>4 | 13803726<br>6 | 6.99435<br>1 | 0.000599472-<br>81606.66952 | 0.683933<br>2 | 1.3614598<br>9 | 0.00066<br>9 | 0.84369<br>8 | 0.00062<br>3 |
| <i>SNHG4*</i>          | ENSG000002813<br>98 | 5 | 13927410<br>2 | 13928489<br>9 | 1.58830<br>8 | 1.096582752-<br>2.300531942 | 0.014375<br>6 | 2.3993038<br>7 | 1.38E-<br>24 | 0.93048<br>8 | 1.90E-<br>09 |
| <i>AC005618.1</i>      | ENSG000002720<br>70 | 5 | 14132621<br>0 | 14132935<br>7 | 1.81309<br>2 | 0.453239666-<br>7.252902566 | 0.400223      | 1.9266624      | 2.60E-<br>11 | 0.84046<br>6 | 4.63E-<br>06 |
| <i>AC011352.1</i><br>* | ENSG000002483<br>62 | 5 | 14788608<br>6 | 14788687<br>8 | 2.33487<br>9 | 1.029622575-<br>5.294813547 | 0.042372<br>4 | 2.3816830<br>2 | 6.91E-<br>06 | 1.17547      | 0.00057<br>4 |
| <i>LINC02159*</i>      | ENSG000002534<br>17 | 5 | 16093177<br>8 | 16093862<br>6 | 1.37755<br>6 | 1.008838605-<br>1.88103354  | 0.04387       | 4.3815023<br>9 | 2.86E-<br>14 | 1.51085<br>7 | 3.25E-<br>05 |
| <i>LINC01863</i>       | ENSG000002539<br>59 | 5 | 17364251<br>9 | 17365819<br>4 | 0.68275<br>5 | 0.297494715-<br>1.566931557 | 0.367930<br>8 | -<br>2.3777444 | 2.63E-<br>09 | -<br>1.96546 | 6.88E-<br>11 |
| <i>AC139491.2</i>      | ENSG000002485<br>96 | 5 | 17614308<br>5 | 17618515<br>5 | 1.18378<br>7 | 0.71779562-<br>1.952299122  | 0.508623<br>3 | 2.0852654<br>6 | 3.67E-<br>12 | -<br>0.79869 | 0.00030<br>7 |
| <i>AC139795.3</i>      | ENSG000002724<br>59 | 5 | 17755482<br>4 | 17755536<br>4 | 1.13588<br>4 | 0.75036849-<br>1.719464812  | 0.546964<br>2 | -0.716249      | 0.00031<br>1 | -<br>0.55412 | 0.00012<br>3 |
| <i>AC008610.1</i>      | ENSG000002483<br>67 | 5 | 18029324<br>5 | 18029525<br>3 | 1.00065<br>5 | 0.8970263-1.116255087       | 0.990635<br>7 | 1.7763502<br>9 | 5.85E-<br>15 | 0.57338      | 0.00020<br>9 |
| <i>AL590004.3</i>      | ENSG000002606<br>04 | 6 | 3904920       | 3911979       | 1.01523<br>4 | 0.717208812-<br>1.437098768 | 0.932044<br>8 | 1.7402199<br>2 | 3.73E-<br>08 | 0.97703<br>1 | 9.93E-<br>06 |
| <i>AL024498.1</i>      | ENSG000002720<br>97 | 6 | 10743324      | 10747663      | 7.08742<br>7 | 0.684052637-<br>73.43239029 | 0.100663<br>1 | 2.0051960<br>5 | 1.71E-<br>15 | 0.62981<br>8 | 2.70E-<br>07 |
| <i>AL008729.1</i>      | ENSG000002150<br>22 | 6 | 13264861      | 13295586      | 2.01693<br>9 | 0.453376307-<br>8.972773735 | 0.356918<br>8 | 1.3392726<br>5 | 1.61E-<br>13 | 0.83181<br>8 | 2.25E-<br>13 |
| <i>AL023583.1</i>      | ENSG000002722<br>09 | 6 | 13825432      | 13826574      | 0.65757<br>5 | 0.314036407-<br>1.376923899 | 0.266261<br>1 | 1.1404735      | 0.00049<br>8 | 0.83021<br>7 | 0.00021<br>4 |

## Supplementary Material

|                    |                 |   |           |           |          |                         |           |            |          |          |          |
|--------------------|-----------------|---|-----------|-----------|----------|-------------------------|-----------|------------|----------|----------|----------|
| <i>LINC01108</i>   | ENSG00000226673 | 6 | 14280127  | 14285454  | 0.395868 | 0.072896655-2.149776272 | 0.2830878 | 2.95801792 | 3.71E-15 | 0.857836 | 0.000644 |
| <i>CASC15</i>      | ENSG00000272168 | 6 | 21664185  | 22654455  | 1.99634  | 0.682481332-5.839534636 | 0.2068134 | 1.87365503 | 1.08E-10 | 1.70887  | 1.05E-18 |
| <i>LINC00240</i>   | ENSG00000224843 | 6 | 26956932  | 27059749  | 1.077736 | 0.606111268-1.91633923  | 0.7987748 | 0.75282463 | 0.000148 | -0.79164 | 1.13E-08 |
| <i>AL009179.1</i>  | ENSG00000281706 | 6 | 27694035  | 27713352  | 40.70408 | 0.940894772-1760.90056  | 0.0538219 | 2.25013558 | 1.82E-06 | 1.350266 | 1.70E-06 |
| <i>HCG18</i>       | ENSG00000231074 | 6 | 30286690  | 30327382  | 0.94949  | 0.637945426-1.41317821  | 0.7983737 | 0.71428782 | 3.13E-11 | 0.566204 | 1.35E-14 |
| <i>SNHG32</i>      | ENSG00000204387 | 6 | 31834608  | 31839766  | 1.002898 | 0.99523323-1.010621428  | 0.459753  | 1.19721687 | 1.67E-20 | 0.50976  | 7.16E-08 |
| <i>Z97832.2</i>    | ENSG00000272374 | 6 | 35220370  | 35224630  | 5.039927 | 0.526174331-48.2746152  | 0.160626  | 1.63258991 | 2.79E-17 | 0.750946 | 9.13E-11 |
| <i>AL033384.2</i>  | ENSG00000271218 | 6 | 53918974  | 53920788  | 2.301459 | 0.652928641-8.112238576 | 0.1947092 | 2.41325036 | 1.77E-09 | 0.80506  | 0.000156 |
| <i>AC019205.1</i>  | ENSG00000229852 | 6 | 73263212  | 73301789  | 3.859058 | 0.369431553-40.31147823 | 0.2592745 | 0.90866176 | 0.00047  | 0.672289 | 0.000241 |
| <i>AL359715.3</i>  | ENSG00000272129 | 6 | 80355424  | 80356859  | 1.51227  | 0.966713537-2.365706453 | 0.0700353 | -1.5681706 | 1.13E-24 | -0.55426 | 1.49E-06 |
| <i>Z99289.1</i>    | ENSG00000237234 | 6 | 112154765 | 112166476 | 1.178415 | 0.076604046-18.12778342 | 0.9062876 | -1.6415336 | 1.49E-07 | -0.97998 | 3.85E-05 |
| <i>LINC01625</i>   | ENSG00000238099 | 6 | 139435636 | 139474658 | 0.783295 | 0.430996908-1.42356266  | 0.4229486 | -1.5500433 | 8.71E-05 | -1.40102 | 1.84E-06 |
| <i>LINC00574</i>   | ENSG00000231690 | 6 | 169790057 | 169802873 | 1.381434 | 0.936307167-2.038176828 | 0.1034576 | -0.7898913 | 4.63E-05 | -0.58642 | 4.60E-05 |
| <i>AL596442.2</i>  | ENSG00000273100 | 6 | 170178681 | 170179660 | 1.068372 | 0.80371523-1.420178784  | 0.64883   | -0.8100756 | 0.000539 | -0.66697 | 2.57E-05 |
| <i>AC093627.7</i>  | ENSG00000261795 | 7 | 161765    | 164972    | 0.035375 | 0.00021383-5.852108493  | 0.1998045 | 1.50879373 | 5.54E-06 | 0.736516 | 0.000676 |
| <i>AC091729.2</i>  | ENSG00000226291 | 7 | 1080863   | 1082178   | 0.995047 | 0.976673482-1.013765795 | 0.6015411 | -2.6408224 | 3.45E-07 | -1.46728 | 3.02E-05 |
| <i>AC102953.2*</i> | ENSG00000273230 | 7 | 1464497   | 1467522   | 1.533676 | 1.056802186-2.225734075 | 0.0244033 | 2.04986731 | 6.42E-34 | 0.643415 | 1.56E-08 |
| <i>AC092171.1</i>  | ENSG00000188365 | 7 | 5419846   | 5423122   | 6.282215 | 0.085036615-464.1085914 | 0.4024927 | 1.33177888 | 8.68E-05 | 0.582562 | 0.000833 |
| <i>AC004160.1</i>  | ENSG00000230333 | 7 | 11180902  | 11520175  | 1.051973 | 0.366275139-3.021354504 | 0.9250093 | -2.3517974 | 5.77E-12 | -1.55033 | 7.09E-10 |



|                              |                     |   |               |               |              |                             |               |                |              |              |              |
|------------------------------|---------------------|---|---------------|---------------|--------------|-----------------------------|---------------|----------------|--------------|--------------|--------------|
| <i>AC004160.2</i>            | ENSG000002304<br>35 | 7 | 11406955      | 11414078      | 1.03592<br>5 | 0.633563256-<br>1.693818411 | 0.888113<br>3 | -2.039784      | 1.58E-<br>06 | -<br>1.82905 | 2.67E-<br>08 |
| <i>AC005165.1</i><br>*       | ENSG000002235<br>61 | 7 | 25593304      | 25751032      | 0.28244<br>1 | 0.079279861-<br>1.006219077 | 0.051128<br>5 | 2.6763986<br>2 | 7.25E-<br>09 | 1.35282<br>2 | 1.97E-<br>05 |
| <i>AC004870.2</i>            | ENSG000002238<br>29 | 7 | 46969644      | 47027481      | 1.16704<br>5 | 0.917394869-<br>1.484631523 | 0.208430<br>4 | 4.7501719<br>5 | 4.08E-<br>07 | 2.83209<br>7 | 1.64E-<br>06 |
| <i>AC006329.1</i>            | ENSG000002324<br>45 | 7 | 10130827<br>0 | 10131480<br>0 | 1.04366<br>5 | 0.986189096-<br>1.104490771 | 0.139201<br>5 | -<br>1.3262956 | 5.74E-<br>06 | -<br>1.24806 | 3.08E-<br>09 |
| <i>AC073111.1</i>            | ENSG000002393<br>77 | 7 | 15037985<br>4 | 15038388<br>5 | 1.80040<br>3 | 0.352213195-<br>9.203093659 | 0.479951<br>9 | 2.5610244<br>6 | 2.48E-<br>13 | 0.64691<br>3 | 5.77E-<br>05 |
| <i>LINC02153</i>             | ENSG000002531<br>99 | 8 | 20972021      | 20995119      | 167.582<br>7 | 0.223938738-<br>125409.1419 | 0.129319<br>4 | -<br>2.5538422 | 1.59E-<br>05 | -1.9056      | 0.00025<br>1 |
| <i>AC124067.2</i>            | ENSG000002534<br>14 | 8 | 37516399      | 37521447      | 1.04965<br>3 | 0.726762202-<br>1.515999818 | 0.796125      | 2.2463812<br>5 | 1.97E-<br>09 | 0.75631<br>5 | 0.00084<br>8 |
| <i>AC138356.1</i>            | ENSG000001831<br>54 | 8 | 37734761      | 37737426      | 0.38407<br>3 | 0.133342959-<br>1.106258569 | 0.076249<br>7 | -<br>2.3248393 | 3.49E-<br>22 | -<br>0.87306 | 1.85E-<br>06 |
| <i>AC079089.1</i>            | ENSG000002465<br>28 | 8 | 69834111      | 69854971      | 1.39290<br>5 | 0.048432242-<br>40.05976106 | 0.846671<br>8 | 1.9672990<br>5 | 3.20E-<br>05 | 0.97521<br>2 | 0.00068<br>8 |
| <i>AC011632.1</i>            | ENSG000002537<br>06 | 8 | 74798784      | 74866939      | 1.24540<br>2 | 0.695882348-<br>2.228864178 | 0.459898<br>1 | 5.6409668<br>5 | 1.61E-<br>14 | 1.71727<br>2 | 0.00035<br>7 |
| <i>AC009902.3</i>            | ENSG000002724<br>25 | 8 | 81275399      | 81277570      | 172.323<br>3 | 0.224353399-<br>132359.6395 | 0.128743<br>8 | 1.6890355<br>8 | 2.73E-<br>05 | 0.93713<br>2 | 2.33E-<br>05 |
| <i>AC009902.2</i><br>*       | ENSG000002540<br>27 | 8 | 81279871      | 81281446      | 9.61683<br>2 | 2.166638544-<br>42.68522305 | 0.002912<br>9 | 1.7885923<br>7 | 1.19E-<br>05 | 1.07092<br>6 | 1.75E-<br>06 |
| <i>CASC8*</i>                | ENSG000002462<br>28 | 8 | 12728981<br>7 | 12748213<br>9 | 1.55418<br>4 | 1.232891832-<br>1.959204777 | 0.000190<br>1 | 2.9916374<br>7 | 7.23E-<br>10 | 1.22197<br>3 | 7.37E-<br>05 |
| <i>AC105219.3</i>            | ENSG000002545<br>74 | 8 | 14370900<br>7 | 14371358<br>4 | 2.33E-<br>05 | 6.31E-19-861200214.2        | 0.503372<br>5 | 2.0709787      | 3.78E-<br>06 | 1.23158<br>4 | 4.93E-<br>06 |
| <i>AL354989.1</i><br>*       | ENSG000002283<br>52 | 9 | 34084332      | 34096225      | 9.48568      | 1.116739452-<br>80.57218029 | 0.039291<br>8 | 1.0792253<br>6 | 0.00040<br>6 | 0.73597<br>7 | 9.15E-<br>06 |
| <i>LINC01508</i>             | ENSG000002311<br>07 | 9 | 90300885      | 90433566      | 1.18328<br>6 | 0.971766973-<br>1.440845238 | 0.093946<br>8 | 2.9282241<br>5 | 0.00035<br>2 | 2.62000<br>4 | 1.51E-<br>06 |
| <i>AL161729.4</i><br>*       | ENSG000002716<br>59 | 9 | 95514045      | 95514520      | 2.56309<br>3 | 1.243760795-<br>5.281919977 | 0.010733<br>7 | 2.2243921<br>4 | 6.98E-<br>09 | 0.70055<br>2 | 0.00065<br>9 |
| <i>FAM225B*</i>              | ENSG000002256<br>84 | 9 | 11310211<br>7 | 11311154<br>3 | 7935.61      | 9.418916428-<br>6685896.614 | 0.008988<br>6 | 1.4456101      | 0.00023<br>9 | 0.88813      | 0.00020<br>9 |
| <i>MIR600HG</i>              | ENSG000002369<br>01 | 9 | 12310949<br>4 | 12311547<br>7 | 1.45888<br>6 | 0.909719675-<br>2.339565888 | 0.117043<br>3 | 1.4024785<br>5 | 4.27E-<br>16 | 0.56274<br>9 | 5.13E-<br>06 |
| <i>MIR181A2H</i><br><i>G</i> | ENSG000002240<br>20 | 9 | 12465846<br>7 | 12469863<br>1 | 0.98580<br>6 | 0.667899508-<br>1.455029573 | 0.942626<br>8 | 1.2570878<br>3 | 3.21E-<br>05 | 0.88771      | 7.35E-<br>06 |

## Supplementary Material

|                    |                 |    |           |           |          |                         |           |            |          |          |          |
|--------------------|-----------------|----|-----------|-----------|----------|-------------------------|-----------|------------|----------|----------|----------|
| <i>AL590708.1</i>  | ENSG00000232850 | 9  | 128128529 | 128130628 | 0.894201 | 0.13934903-5.738083122  | 0.9061464 | 3.61816328 | 2.39E-24 | 0.619374 | 0.000451 |
| <i>AL391056.1</i>  | ENSG00000227619 | 9  | 129575117 | 129584556 | 1.009393 | 0.969192443-1.051261474 | 0.6520756 | 3.71488164 | 2.50E-19 | 1.035387 | 0.000447 |
| <i>AL355574.1</i>  | ENSG00000238058 | 9  | 135907812 | 135916126 | 1.023471 | 0.789569081-1.326664081 | 0.860886  | 1.35520951 | 4.71E-13 | 0.556164 | 1.50E-06 |
| <i>SNHG7*</i>      | ENSG00000233016 | 9  | 136721366 | 136728184 | 1.031789 | 1.004086404-1.060255492 | 0.0242183 | 1.56275787 | 7.07E-23 | 0.672029 | 3.59E-09 |
| <i>AL355987.4*</i> | ENSG00000273066 | 9  | 136799223 | 136810042 | 1.215544 | 1.020356226-1.448069132 | 0.0288442 | 2.22764707 | 1.33E-16 | 1.454813 | 5.99E-15 |
| <i>AL359878.1*</i> | ENSG00000205740 | 10 | 971146    | 988341    | 149.7894 | 3.803908753-5898.371007 | 0.007521  | 2.4687884  | 2.88E-18 | 0.815126 | 2.54E-08 |
| <i>LINC00839*</i>  | ENSG00000185904 | 10 | 42475480  | 42495337  | 1.19592  | 1.027893158-1.391414827 | 0.0205527 | 1.23782867 | 3.33E-06 | 1.48671  | 2.00E-15 |
| <i>AL353801.1</i>  | ENSG00000223462 | 10 | 44937508  | 44955725  | 1.111532 | 0.56214931-2.197822627  | 0.761127  | 1.93094349 | 1.09E-06 | 0.795232 | 0.000225 |
| <i>AL356056.2</i>  | ENSG00000231187 | 10 | 46580708  | 46598150  | 0.967178 | 0.601175224-1.556008553 | 0.890589  | 1.18710449 | 7.31E-06 | 0.827882 | 3.10E-06 |
| <i>LINC02640</i>   | ENSG00000233590 | 10 | 68233251  | 68242379  | 0.914566 | 0.617229577-1.355136298 | 0.6562111 | -1.0149771 | 0.000512 | -1.24207 | 2.73E-09 |
| <i>LINC02636*</i>  | ENSG00000224222 | 10 | 69994276  | 70019496  | 1.698164 | 1.06989053-2.695379068  | 0.0246677 | 2.24233862 | 6.10E-05 | 1.469202 | 1.73E-05 |
| <i>AC016394.2*</i> | ENSG00000272599 | 10 | 73124573  | 73125532  | 1.558133 | 1.153255186-2.105153978 | 0.0038679 | 1.7713731  | 7.53E-30 | 0.511511 | 1.76E-07 |
| <i>LINC01374</i>   | ENSG00000280560 | 10 | 89853595  | 90225443  | 0.705973 | 0.084759889-5.880114561 | 0.7475042 | 1.51878373 | 0.000643 | 1.009817 | 9.10E-05 |
| <i>AL133215.2*</i> | ENSG00000273162 | 10 | 101060029 | 101061005 | 3.33686  | 1.770642583-6.288469499 | 0.0001937 | 2.65434429 | 5.50E-17 | 0.758127 | 8.74E-06 |
| <i>TLX1NB</i>      | ENSG00000236311 | 10 | 101089321 | 101131126 | 2.624255 | 0.196557885-35.03656867 | 0.4656018 | 2.86269567 | 2.93E-09 | 1.072647 | 0.000187 |
| <i>AL121929.3</i>  | ENSG00000287419 | 10 | 103573157 | 103583687 | 0.466464 | 0.104069034-2.09080724  | 0.3190898 | 1.64757471 | 6.98E-06 | 0.93454  | 5.88E-05 |
| <i>AL158212.3</i>  | ENSG00000260917 | 10 | 112823490 | 112827726 | 1.113451 | 0.658491224-1.882747749 | 0.6884296 | 1.49928659 | 8.12E-23 | 0.541992 | 2.10E-07 |
| <i>AL158166.1*</i> | ENSG00000227076 | 10 | 127934698 | 127936167 | 6.169867 | 1.456329662-26.13917543 | 0.0135003 | 1.25053313 | 0.000768 | 1.270017 | 1.65E-09 |
| <i>AL451069.3*</i> | ENSG00000234311 | 10 | 132433733 | 132441484 | 1.115362 | 1.026797971-1.211565815 | 0.0096971 | 3.67085551 | 9.32E-09 | 3.653368 | 1.47E-23 |

|                   |                     |    |               |               |              |                             |               |                |              |              |              |
|-------------------|---------------------|----|---------------|---------------|--------------|-----------------------------|---------------|----------------|--------------|--------------|--------------|
| <i>AP006285.1</i> | ENSG000002314<br>87 | 11 | 1662584       | 1663343       | 0.9657       | 0.749153603-<br>1.244841093 | 0.787613<br>4 | -<br>1.6228157 | 8.57E-<br>06 | -<br>1.69138 | 1.72E-<br>10 |
| <i>FAM99A</i>     | ENSG000002058<br>66 | 11 | 1665597       | 1667856       | 0.98011<br>2 | 0.954945704-<br>1.005942184 | 0.130135<br>8 | -<br>1.9163158 | 6.92E-<br>07 | -<br>1.70024 | 1.04E-<br>09 |
| <i>FAM99B</i>     | ENSG000002058<br>65 | 11 | 1683269       | 1685629       | 0.98660<br>1 | 0.941580037-<br>1.033774618 | 0.571346<br>1 | -<br>1.6945256 | 3.64E-<br>06 | -<br>1.58802 | 1.94E-<br>09 |
| <i>KCNQ1OT1</i>   | ENSG000002698<br>21 | 11 | 2608328       | 2699994       | 0.67294<br>9 | 0.003084864-<br>146.800923  | 0.885376      | 1.2220132<br>8 | 1.94E-<br>10 | 0.60334<br>5 | 1.56E-<br>05 |
| <i>LINC02709</i>  | ENSG000002455<br>22 | 11 | 9754770       | 9759533       | 1.37335      | 0.255495197-<br>7.382095064 | 0.711587<br>8 | 1.4664747<br>1 | 8.06E-<br>12 | 0.96036<br>3 | 2.78E-<br>12 |
| <i>LINC00958*</i> | ENSG000002513<br>81 | 11 | 12961541      | 12989597      | 1.13861<br>8 | 1.00450195-<br>1.290641218  | 0.042334<br>9 | 3.1647766<br>2 | 2.36E-<br>06 | 1.53909<br>4 | 0.00056<br>6 |
| <i>AC124798.1</i> | ENSG000002601<br>96 | 11 | 17380649      | 17383531      | 1.03672<br>8 | 0.787984621-<br>1.363992496 | 0.796649<br>1 | 1.0649885<br>8 | 0.00019<br>8 | 0.73380<br>1 | 0.00052<br>1 |
| <i>AC004923.4</i> | ENSG000002553<br>06 | 11 | 68024809      | 68030461      | 1.59813<br>9 | 0.595643108-<br>4.287882583 | 0.351824<br>5 | 1.4833925<br>3 | 4.79E-<br>10 | 0.67603<br>1 | 7.68E-<br>07 |
| <i>AP002761.3</i> | ENSG000002570<br>38 | 11 | 73307235      | 73309361      | 1.06025<br>4 | 0.645045652-<br>1.742726273 | 0.817501<br>8 | -<br>0.8475016 | 0.00030<br>5 | 0.77865<br>3 | 7.31E-<br>06 |
| <i>AP001527.2</i> | ENSG000002774<br>59 | 11 | 10210982<br>7 | 10211045<br>7 | 1.48456<br>1 | 0.691719268-<br>3.186148569 | 0.310562<br>1 | 1.0599906<br>6 | 1.08E-<br>05 | 0.82830<br>1 | 5.13E-<br>09 |
| <i>COLCA1</i>     | ENSG000001961<br>67 | 11 | 11129078<br>7 | 11130549<br>8 | 0.92676<br>3 | 0.643748747-<br>1.334200995 | 0.682471<br>7 | 1.8097954<br>6 | 4.27E-<br>13 | 0.66722<br>3 | 0.00044<br>3 |
| <i>AP000757.2</i> | ENSG000002548<br>44 | 11 | 11781844<br>3 | 11782199<br>2 | 0.92091<br>1 | 0.768463781-<br>1.103599676 | 0.372212<br>1 | 2.5343361<br>5 | 4.36E-<br>06 | 2.18040<br>6 | 1.86E-<br>08 |
| <i>AP000866.2</i> | ENSG000002500<br>73 | 11 | 12475912<br>9 | 12476611<br>9 | 1.80696<br>7 | 0.733627765-<br>4.450660407 | 0.198285<br>4 | 1.1384025      | 3.09E-<br>08 | 0.56296<br>2 | 2.41E-<br>05 |
| <i>AP000842.3</i> | ENSG000002602<br>09 | 11 | 12587303<br>1 | 12587452<br>8 | 27.0137<br>2 | 0.357952749-<br>2038.652657 | 0.135108<br>5 | 2.2021726<br>7 | 9.99E-<br>07 | 0.96343<br>2 | 0.00041<br>1 |
| <i>GSEC</i>       | ENSG000002808<br>32 | 11 | 12634088<br>9 | 12635558<br>7 | 1.46250<br>2 | 0.831616859-<br>2.57199346  | 0.186896<br>9 | 1.3232232<br>7 | 2.27E-<br>15 | 0.50047<br>3 | 3.84E-<br>05 |
| <i>LINC00942</i>  | ENSG000002496<br>28 | 12 | 1500525       | 1504424       | 1.00712<br>2 | 0.979718445-<br>1.035292555 | 0.614108<br>8 | 6.1418940<br>6 | 1.21E-<br>24 | 2.44453<br>2 | 2.21E-<br>10 |
| <i>LINC01559</i>  | ENSG000001808<br>61 | 12 | 13371089      | 13387167      | 0.87030<br>2 | 0.526529299-<br>1.438525443 | 0.587962<br>5 | 2.2046173<br>2 | 0.00021<br>7 | 1.99863<br>7 | 5.10E-<br>07 |
| <i>AC008250.2</i> | ENSG000002755<br>67 | 12 | 21828360      | 21828564      | 0.69742<br>3 | 0.441260814-<br>1.102292648 | 0.122840<br>1 | -<br>1.2825603 | 2.23E-<br>06 | -<br>0.79521 | 0.00015<br>2 |
| <i>LINC00941</i>  | ENSG000002358<br>84 | 12 | 30755167      | 30802602      | 1.30555<br>7 | 0.668113731-<br>2.55118271  | 0.435353<br>7 | 2.5541883      | 5.25E-<br>12 | 1.72991<br>2 | 3.25E-<br>12 |
| <i>AC048344.4</i> | ENSG000002773<br>42 | 12 | 32109076      | 32109602      | 4.12412<br>4 | 0.691454361-<br>24.59800267 | 0.119940<br>1 | 1.4402755<br>6 | 0.00026<br>8 | 0.87131<br>7 | 0.00011<br>8 |

## Supplementary Material

|                        |                     |    |               |               |              |                             |               |                |              |              |              |
|------------------------|---------------------|----|---------------|---------------|--------------|-----------------------------|---------------|----------------|--------------|--------------|--------------|
| <i>AC026356.2</i>      | ENSG000002761<br>15 | 12 | 32352349      | 32354144      | 3.74996<br>4 | 0.348190734-<br>40.38656697 | 0.275728<br>7 | 1.4015662<br>2 | 1.91E-<br>08 | 0.70197<br>7 | 1.52E-<br>06 |
| <i>LINC02156*</i>      | ENSG000002579<br>06 | 12 | 47377638      | 47420192      | 1.62393<br>1 | 1.048854076-<br>2.514317939 | 0.029718<br>8 | -<br>1.7391067 | 2.00E-<br>06 | -<br>1.07529 | 0.00016<br>2 |
| <i>AC125611.4</i><br>* | ENSG000002583<br>34 | 12 | 49292631      | 49324576      | 7379140<br>8 | 10.43215663-<br>5.2196E+14  | 0.024362<br>5 | 1.6241763<br>3 | 0.00012<br>4 | 0.92717<br>2 | 0.00026<br>6 |
| <i>LINC02381</i>       | ENSG000002507<br>42 | 12 | 54126082      | 54147485      | 1.01380<br>1 | 0.96890885-1.06077259       | 0.553086<br>9 | 1.1436359<br>4 | 0.00012<br>2 | 1.50152<br>2 | 1.44E-<br>12 |
| <i>AC078778.1</i>      | ENSG000002583<br>44 | 12 | 54276631      | 54345083      | 3.66454<br>4 | 0.174861795-<br>76.79712074 | 0.402801<br>2 | 1.4062483<br>7 | 0.00026      | 0.72344<br>9 | 0.00087      |
| <i>LINC02421</i>       | ENSG000002559<br>70 | 12 | 67709047      | 67729475      | 35.5391<br>3 | 0.489085568-<br>2582.431666 | 0.102492<br>6 | 2.0509473<br>6 | 1.84E-<br>06 | 0.86429<br>5 | 0.00046<br>2 |
| <i>AC020656.2</i>      | ENSG000002749<br>79 | 12 | 69326574      | 69331882      | 1.16385<br>6 | 0.670828377-<br>2.019234281 | 0.589357<br>1 | 1.4666032<br>3 | 1.11E-<br>06 | 0.84889<br>3 | 0.00012      |
| <i>AC083809.1</i>      | ENSG000002772<br>47 | 12 | 70570969      | 70571440      | 0.99781<br>1 | 0.985592735-<br>1.010181046 | 0.727406<br>4 | 3.0209950<br>9 | 2.87E-<br>08 | 2.30557<br>1 | 1.61E-<br>09 |
| <i>LINC01619</i>       | ENSG000002572<br>42 | 12 | 91984976      | 92142914      | 0.46166<br>8 | 0.109466981-<br>1.947049095 | 0.292541<br>4 | 0.8967048<br>5 | 0.00049<br>9 | 0.62934<br>5 | 0.00074<br>7 |
| <i>LINC02413</i>       | ENSG000002573<br>45 | 12 | 92999218      | 93019820      | 0.66943<br>1 | 0.365519547-<br>1.226029001 | 0.193631      | 4.1131424<br>6 | 1.70E-<br>09 | 3.55302<br>9 | 3.46E-<br>17 |
| <i>AC007298.2</i>      | ENSG000002578<br>78 | 12 | 95996521      | 96011489      | 1.04329<br>9 | 0.782229401-<br>1.391500413 | 0.772985<br>8 | -<br>1.6686035 | 4.70E-<br>08 | -<br>1.00553 | 1.29E-<br>05 |
| <i>AC089983.1</i>      | ENSG000002577<br>32 | 12 | 10426231<br>4 | 10428072<br>2 | 0.92871      | 0.346021299-<br>2.492626836 | 0.883272<br>5 | 2.9090700<br>4 | 5.03E-<br>08 | 1.10668<br>7 | 0.00085<br>4 |
| <i>AC026368.1</i>      | ENSG000002778<br>40 | 12 | 11700246<br>3 | 11700315<br>2 | 1.17055<br>7 | 0.737029711-<br>1.859089981 | 0.504639<br>3 | 2.0672981<br>1 | 2.15E-<br>08 | 1.56456<br>6 | 2.25E-<br>13 |
| <i>AC069234.5</i>      | ENSG000002774<br>23 | 12 | 12070386<br>7 | 12070428<br>2 | 1.74433<br>6 | 0.740120422-<br>4.111100344 | 0.203386<br>9 | 1.2812622<br>9 | 7.66E-<br>06 | 0.6732       | 5.49E-<br>05 |
| <i>AC156455.1</i>      | ENSG000002565<br>46 | 12 | 12206330<br>6 | 12206861<br>6 | 0.68986      | 0.253758509-<br>1.87543125  | 0.466862<br>9 | 0.8597889      | 0.00049<br>5 | 0.64938<br>9 | 0.00025<br>6 |
| <i>AC145423.2</i>      | ENSG000002744<br>27 | 12 | 12351527<br>5 | 12351551<br>3 | 1.1503       | 0.978249259-<br>1.352610262 | 0.090278<br>6 | 1.6943989<br>8 | 1.22E-<br>08 | 0.62782<br>9 | 0.00048<br>4 |
| <i>AC135586.2</i>      | ENSG000002566<br>32 | 12 | 13268804<br>9 | 13271491<br>2 | 0.59044<br>7 | 0.189306745-<br>1.841603615 | 0.363973<br>3 | -<br>1.1399306 | 9.69E-<br>10 | -<br>0.69941 | 6.63E-<br>07 |
| <i>ALI161772.1</i>     | ENSG000002782<br>91 | 13 | 20699307      | 20703718      | 1.29353<br>2 | 0.943130812-<br>1.774116748 | 0.110326<br>8 | 1.9112202<br>9 | 2.72E-<br>08 | 0.88213<br>9 | 7.17E-<br>05 |
| <i>LINC00327</i>       | ENSG000002329<br>77 | 13 | 23465776      | 23487712      | 0.00210<br>1 | 2.59E-06-1.705584496        | 0.071268<br>9 | 1.4624138<br>5 | 0.00032      | 1.12108<br>2 | 9.29E-<br>06 |

|                    |                 |    |           |           |          |                         |           |            |          |          |          |
|--------------------|-----------------|----|-----------|-----------|----------|-------------------------|-----------|------------|----------|----------|----------|
| <i>AL161891.1</i>  | ENSG00000276672 | 13 | 33846190  | 33850825  | 0.930539 | 0.122570429-7.064536009 | 0.944506  | 1.18029085 | 2.89E-10 | 0.551651 | 3.41E-05 |
| <i>AL356740.3</i>  | ENSG00000269376 | 13 | 113009671 | 113010319 | 0.842345 | 0.439807208-1.613310118 | 0.6048471 | 2.40008681 | 7.63E-05 | 1.341036 | 0.000625 |
| <i>AL442125.1*</i> | ENSG00000276248 | 13 | 113527260 | 113530621 | 30.38451 | 1.147030882-804.876473  | 0.04115   | 1.07840104 | 1.41E-06 | 0.513358 | 0.000514 |
| <i>AL356019.2</i>  | ENSG00000258768 | 14 | 20260480  | 20264308  | 2.016009 | 0.547361931-7.42523774  | 0.2918824 | 1.03093847 | 5.55E-08 | 0.683662 | 4.34E-08 |
| <i>AL161668.4</i>  | ENSG00000258604 | 14 | 21024172  | 21029271  | 0.999514 | 0.924415979-1.080711789 | 0.9902574 | -1.9174954 | 3.03E-13 | -0.78438 | 8.96E-05 |
| <i>AL121790.1</i>  | ENSG00000258414 | 14 | 37564047  | 37579125  | 5.262302 | 0.880392549-31.45395258 | 0.0687101 | -1.336481  | 2.96E-05 | -1.07683 | 7.15E-06 |
| <i>AL163953.1</i>  | ENSG00000225680 | 14 | 53599832  | 53614026  | 0.809417 | 0.560204369-1.169494026 | 0.2601251 | 3.80749967 | 1.06E-17 | 1.27787  | 1.13E-06 |
| <i>AL359232.1</i>  | ENSG00000258561 | 14 | 66212810  | 66509394  | 2.497994 | 0.290768284-21.46030284 | 0.404117  | -0.8077796 | 0.000104 | -0.68539 | 8.07E-06 |
| <i>LINC01269</i>   | ENSG00000258689 | 14 | 70698698  | 70712153  | 1.001789 | 0.890794206-1.126614106 | 0.9761996 | 3.15400984 | 2.86E-11 | 1.006475 | 0.000346 |
| <i>AC005225.2</i>  | ENSG00000258603 | 14 | 73555115  | 73633941  | 1.194652 | 0.890522556-1.602648162 | 0.2354334 | -0.7212067 | 0.000101 | -0.54942 | 6.21E-05 |
| <i>AF111167.2</i>  | ENSG00000259319 | 14 | 75423683  | 75427741  | 1.299169 | 0.633018163-2.66633834  | 0.4755549 | -0.7772317 | 0.000201 | -0.57689 | 0.000238 |
| <i>AL133279.1*</i> | ENSG00000258538 | 14 | 88175391  | 88180198  | 6.743691 | 1.318714991-34.48612528 | 0.0218925 | -1.1452646 | 0.000301 | -1.30567 | 3.38E-08 |
| <i>AL137230.2</i>  | ENSG00000259053 | 14 | 89412312  | 89954659  | 1.856886 | 0.657302145-5.245723674 | 0.2427908 | 1.40054534 | 1.28E-08 | -0.70451 | 2.45E-05 |
| <i>LINC02321</i>   | ENSG00000258884 | 14 | 90820064  | 90828199  | 1.136368 | 0.952569606-1.355630612 | 0.1555635 | 0.95416931 | 9.07E-05 | -0.62995 | 0.000261 |
| <i>AL133467.1</i>  | ENSG00000258572 | 14 | 95516136  | 95517911  | 0.999698 | 0.545858114-1.830873156 | 0.9992205 | -0.931784  | 7.87E-05 | -0.65378 | 0.000203 |
| <i>AL355102.4</i>  | ENSG00000258793 | 14 | 96259411  | 96268624  | 0.995061 | 0.943789318-1.049117334 | 0.8544411 | 2.04279622 | 9.28E-10 | 0.99145  | 6.72E-05 |
| <i>MEG3</i>        | ENSG00000214548 | 14 | 100779410 | 100861031 | 1.007153 | 0.976852758-1.038393422 | 0.6474352 | 1.26871427 | 0.00024  | 1.143751 | 3.83E-06 |
| <i>AL161669.3*</i> | ENSG00000278071 | 14 | 103208100 | 103208876 | 1.250841 | 1.113895204-1.40462346  | 0.0001548 | 1.37509844 | 3.95E-11 | -0.52927 | 0.000516 |
| <i>AC026495.1</i>  | ENSG00000258654 | 15 | 20344736  | 20359166  | 2.616509 | 0.918647841-7.452386834 | 0.071691  | 2.10808558 | 1.22E-06 | -1.04407 | 0.000174 |
| <i>SNHG14</i>      | ENSG00000224078 | 15 | 24978583  | 25420336  | 1.063529 | 0.835984593-1.353007676 | 0.6160511 | 0.82582162 | 0.000715 | 0.970592 | 2.22E-08 |

## Supplementary Material

|                        |                     |    |          |          |              |                             |               |                |              |              |              |
|------------------------|---------------------|----|----------|----------|--------------|-----------------------------|---------------|----------------|--------------|--------------|--------------|
| <i>AC124312.3</i>      | ENSG000002610<br>69 | 15 | 25087661 | 25088896 | 1.21694<br>6 | 0.599597236-<br>2.469921598 | 0.586672<br>4 | 1.2993365<br>2 | 0.00049<br>5 | 1.15505      | 3.96E-<br>06 |
| <i>AC091057.1</i>      | ENSG000001879<br>51 | 15 | 30658717 | 30772993 | 1.88909<br>4 | 0.797320259-<br>4.475839341 | 0.148367<br>9 | 2.1163950<br>4 | 4.72E-<br>32 | 0.74798<br>5 | 7.61E-<br>10 |
| <i>AC078909.2</i>      | ENSG000002744<br>44 | 15 | 37109587 | 37109984 | 0.88705<br>1 | 0.639251476-<br>1.230906384 | 0.473344      | 3.1716091<br>8 | 7.34E-<br>16 | 0.79980<br>9 | 0.00010<br>1 |
| <i>AC020658.4</i><br>* | ENSG000002737<br>86 | 15 | 40226386 | 40227069 | 17.6358<br>5 | 1.784120013-<br>174.3287218 | 0.014079<br>2 | 2.5027590<br>3 | 6.37E-<br>09 | 0.99075<br>3 | 6.43E-<br>05 |
| <i>AC020661.1</i>      | ENSG000002511<br>61 | 15 | 40906811 | 40910337 | 1.99763<br>6 | 0.446962568-<br>8.928151412 | 0.365034<br>3 | 1.1643713      | 1.77E-<br>06 | 0.71568<br>4 | 8.41E-<br>07 |
| <i>AC025580.1</i><br>* | ENSG000002593<br>42 | 15 | 45430652 | 45441808 | 1.52232<br>3 | 1.055371992-<br>2.195877158 | 0.024557<br>3 | 2.1209624<br>8 | 2.21E-<br>05 | 1.74097      | 6.08E-<br>08 |
| <i>AC104574.2</i>      | ENSG000002596<br>16 | 15 | 61298791 | 61635449 | 2.67002<br>8 | 0.683187165-<br>10.43498898 | 0.157907<br>5 | 1.8175672<br>4 | 0.00039<br>3 | -<br>1.15764 | 0.00017<br>3 |
| <i>AC103740.1</i>      | ENSG000002593<br>70 | 15 | 62827675 | 62884034 | 1.24623<br>7 | 0.731440212-<br>2.123355392 | 0.418133<br>2 | -<br>1.3783106 | 2.01E-<br>07 | -<br>0.82876 | 3.08E-<br>05 |
| <i>AC026992.2</i>      | ENSG000002616<br>34 | 15 | 69278328 | 69298795 | 2.67331      | 0.409607699-<br>17.44739337 | 0.304233<br>4 | 2.3661216<br>9 | 1.03E-<br>07 | 1.26009<br>1 | 1.37E-<br>05 |
| <i>LINC02259</i>       | ENSG000002597<br>83 | 15 | 72608481 | 72636962 | 0.45178<br>1 | 0.110955511-<br>1.839529874 | 0.267370<br>7 | -<br>0.9021792 | 0.00015<br>6 | -<br>0.75711 | 2.03E-<br>05 |
| <i>LINC01579</i>       | ENSG000002587<br>54 | 15 | 93718542 | 94070898 | 6.22994<br>1 | 0.010542927-<br>3681.345853 | 0.574223<br>2 | 2.8971066<br>9 | 2.16E-<br>05 | 1.64958<br>2 | 0.00021<br>3 |
| <i>Z92544.1</i>        | ENSG000002603<br>94 | 16 | 678504   | 679777   | 1.11444<br>7 | 0.205715089-<br>6.03743751  | 0.899972<br>7 | 0.8873756<br>8 | 1.58E-<br>06 | 0.74845<br>1 | 3.94E-<br>11 |
| <i>AL031705.1</i>      | ENSG000002606<br>46 | 16 | 1512979  | 1514675  | 2.98495<br>8 | 0.423855728-<br>21.0212492  | 0.272170<br>9 | 1.8794945<br>3 | 2.11E-<br>07 | 0.67138<br>7 | 0.00028      |
| <i>AL031722.1</i>      | ENSG000002605<br>41 | 16 | 1841020  | 1843547  | 0.77076<br>6 | 0.579646452-<br>1.024900006 | 0.073325<br>1 | -<br>1.0688748 | 3.76E-<br>07 | -<br>0.71215 | 6.56E-<br>06 |
| <i>AC012676.1</i><br>* | ENSG000002627<br>12 | 16 | 4335870  | 4337818  | 1.93953      | 1.010689126-<br>3.721993596 | 0.046378<br>2 | 1.4021383<br>4 | 1.18E-<br>12 | 0.60529      | 8.07E-<br>06 |
| <i>AC009093.1</i>      | ENSG000002598<br>07 | 16 | 29215385 | 29221040 | 1.71960<br>8 | 0.27185036-<br>10.87749743  | 0.564615<br>3 | 1.1170625      | 3.05E-<br>05 | 0.63773<br>6 | 0.00021      |
| <i>AC009093.5</i>      | ENSG000002735<br>82 | 16 | 29225594 | 29226348 | 1.01166      | 0.828159702-<br>1.235818877 | 0.909616<br>9 | -<br>1.3815593 | 6.39E-<br>05 | -<br>1.34534 | 7.00E-<br>08 |
| <i>AC135048.1</i>      | ENSG000002614<br>87 | 16 | 30948386 | 30956511 | 1.07143<br>8 | 0.694042771-<br>1.654045869 | 0.755456<br>2 | -<br>0.7853643 | 0.00018<br>7 | -<br>0.61066 | 9.07E-<br>05 |
| <i>AC007344.1</i>      | ENSG000002608<br>50 | 16 | 51354456 | 51525157 | 2.91832<br>1 | 0.700572907-<br>12.1566169  | 0.141249<br>6 | -<br>1.5227419 | 0.00027<br>6 | -<br>1.36633 | 3.48E-<br>05 |

|             |                 |    |          |          |          |                         |           |            |          |          |          |
|-------------|-----------------|----|----------|----------|----------|-------------------------|-----------|------------|----------|----------|----------|
| AC040168.1  | ENSG00000246379 | 16 | 55984009 | 56191118 | 0.312688 | 0.018605631-5.25507556  | 0.4193794 | -1.3331888 | 0.000594 | -1.20888 | 4.33E-05 |
| AC026461.2  | ENSG00000259923 | 16 | 56648881 | 56652636 | 0.956705 | 0.733521364-1.247794578 | 0.7439947 | -3.0285505 | 1.68E-11 | -1.90587 | 1.17E-07 |
| AC027682.6  | ENSG00000276075 | 16 | 67517862 | 67528675 | 1.048944 | 0.994186836-1.106717829 | 0.0806661 | -0.6849061 | 0.000704 | -0.65577 | 6.21E-06 |
| LINC01572   | ENSG00000261008 | 16 | 72236281 | 72665014 | 2.359065 | 0.04111062-135.3710139  | 0.677867  | 2.20792081 | 1.04E-14 | 0.585365 | 0.000882 |
| AC009159.3  | ENSG00000278058 | 16 | 79605802 | 79606605 | 0.965878 | 0.750918437-1.242372238 | 0.7869289 | -1.2816562 | 3.34E-13 | -0.57261 | 1.41E-05 |
| AC026469.1  | ENSG00000275088 | 16 | 85142696 | 85146001 | 1.299413 | 0.565770686-2.984378878 | 0.5369835 | -1.2439741 | 4.15E-05 | -0.90855 | 1.99E-05 |
| LINC02188   | ENSG00000261175 | 16 | 86710122 | 86742083 | 1.128169 | 0.810120708-1.571080385 | 0.4753961 | 2.75062146 | 1.85E-09 | 2.158765 | 9.31E-14 |
| AC134312.6  | ENSG00000261816 | 16 | 88191486 | 88193667 | 2.454265 | 0.482379859-12.48687706 | 0.2794009 | -1.4082742 | 0.000206 | -1.10797 | 0.000207 |
| AC092384.2  | ENSG00000259881 | 16 | 88881038 | 88887136 | 1.045367 | 0.728734481-1.49957464  | 0.8095481 | -2.3076925 | 2.33E-09 | -1.4274  | 8.44E-07 |
| AC137932.1  | ENSG00000260279 | 16 | 89296128 | 89298317 | 0.921493 | 0.666785823-1.273495026 | 0.6203761 | 0.92358005 | 5.88E-06 | -0.52307 | 0.000283 |
| AC129507.2  | ENSG00000262294 | 17 | 352638   | 357581   | 1.128267 | 0.938623299-1.356227845 | 0.1986718 | -1.2388348 | 1.19E-08 | -0.77273 | 1.39E-06 |
| AC099684.1  | ENSG00000228133 | 17 | 2017716  | 2020706  | 1.099259 | 0.7742039-1.560791457   | 0.5967268 | -1.0805397 | 6.90E-05 | -0.83943 | 2.54E-05 |
| AC027796.4  | ENSG00000262903 | 17 | 3655621  | 3658092  | 0.95334  | 0.708826409-1.282199549 | 0.7519909 | 1.80058327 | 4.04E-15 | 0.590546 | 0.000146 |
| AC087742.1* | ENSG00000274363 | 17 | 4267691  | 4268430  | 4.012918 | 1.066637166-15.0974613  | 0.0398414 | 1.83554718 | 3.10E-08 | 0.621557 | 0.000426 |
| AC015908.3  | ENSG00000264016 | 17 | 10741257 | 10769089 | 0.966821 | 0.78183101-1.195582161  | 0.7555002 | -1.3734152 | 1.24E-13 | -0.86558 | 7.79E-11 |
| AC005224.2  | ENSG00000266378 | 17 | 14327335 | 14329474 | 3.35267  | 0.170014747-66.11423124 | 0.4264796 | -1.2863771 | 1.95E-05 | -0.79845 | 0.000551 |
| AC093484.4  | ENSG00000266651 | 17 | 16440479 | 16440952 | 1.57454  | 0.921221617-2.691182956 | 0.0969288 | 1.00831066 | 4.74E-05 | 0.539502 | 0.000717 |
| AC005722.4  | ENSG00000264785 | 17 | 19737682 | 19738542 | 0.949212 | 0.764930528-1.17788925  | 0.6360027 | 3.87357108 | 4.76E-08 | 1.690462 | 0.000158 |
| AC005730.2  | ENSG00000261033 | 17 | 20008051 | 20009234 | 0.698059 | 0.26701214-1.824958302  | 0.4634992 | 1.89478792 | 0.000637 | 1.249122 | 0.00023  |
| AC006449.2  | ENSG00000275532 | 17 | 38703480 | 38706261 | 0.982839 | 0.378092922-2.554853786 | 0.9716694 | 1.115684   | 1.28E-06 | 0.556458 | 3.28E-05 |

## Supplementary Material

|                    |                 |    |          |          |          |                         |           |            |          |          |          |
|--------------------|-----------------|----|----------|----------|----------|-------------------------|-----------|------------|----------|----------|----------|
| <i>AC060780.1</i>  | ENSG00000267002 | 17 | 43148368 | 43171037 | 0.981741 | 0.889934378-1.083018426 | 0.7129671 | 0.71739411 | 9.38E-06 | 0.587314 | 1.09E-07 |
| <i>AC091133.3</i>  | ENSG00000250838 | 17 | 48995266 | 48997492 | 1.284977 | 0.770155292-2.143939222 | 0.3370402 | 3.04636409 | 0.000924 | 2.145606 | 0.000277 |
| <i>AC011921.1</i>  | ENSG00000259349 | 17 | 60526293 | 60550798 | 2.236211 | 0.787725515-6.348202519 | 0.1305967 | 2.36305006 | 8.24E-18 | 0.62128  | 1.87E-06 |
| <i>LINC01993</i>   | ENSG00000204277 | 17 | 78261349 | 78278492 | 0.762954 | 0.112380092-5.179729572 | 0.7818833 | 1.47465246 | 0.000529 | 1.190879 | 4.43E-05 |
| <i>LINC01978</i>   | ENSG00000262188 | 17 | 79919357 | 79925999 | 0.586805 | 0.15792652-2.180382359  | 0.4260394 | 1.11230313 | 0.000203 | 1.019068 | 2.16E-07 |
| <i>AC116025.2*</i> | ENSG00000262172 | 17 | 79991944 | 79992841 | 2.414076 | 1.446456208-4.028994367 | 0.0007451 | 3.3053428  | 2.58E-19 | 0.71116  | 6.52E-05 |
| <i>AC132872.2</i>  | ENSG00000264548 | 17 | 82214227 | 82217352 | 2.77092  | 0.152215943-50.44147842 | 0.4911858 | 2.61614702 | 5.64E-19 | 0.574769 | 0.000203 |
| <i>AP002478.1</i>  | ENSG00000266401 | 18 | 3653030  | 3656282  | 1.174257 | 0.932000208-1.479484572 | 0.1730077 | 4.44834053 | 5.42E-12 | 1.903118 | 3.12E-06 |
| <i>AC006557.1*</i> | ENSG00000267150 | 18 | 14089935 | 14091019 | 23.4933  | 1.033813445-533.8827443 | 0.0476102 | 2.12627524 | 1.41E-07 | 1.103503 | 4.09E-07 |
| <i>AC023983.2</i>  | ENSG00000273321 | 18 | 24402153 | 24402714 | 0.809306 | 0.214969062-3.046839901 | 0.7544259 | 1.67719    | 0.000377 | 0.964242 | 0.000781 |
| <i>PCAT18</i>      | ENSG00000265369 | 18 | 26687621 | 26703638 | 3.915832 | 0.054647892-280.5916811 | 0.5311287 | -1.535594  | 9.81E-06 | -0.92732 | 0.000801 |
| <i>AC011815.1</i>  | ENSG00000268573 | 18 | 35280867 | 35290201 | 0.993159 | 0.33477316-2.946369535  | 0.990129  | 1.2025434  | 5.02E-10 | 0.627031 | 2.85E-06 |
| <i>LINC01901</i>   | ENSG00000267413 | 18 | 39841174 | 39924840 | 1.696693 | 0.570654783-5.044674007 | 0.3416338 | 3.7091014  | 6.79E-09 | 1.446907 | 0.000369 |
| <i>AC090227.3</i>  | ENSG00000267674 | 18 | 49739823 | 49742063 | 1.019597 | 0.367846572-2.8261166   | 0.970238  | -2.6166873 | 2.92E-09 | -1.26915 | 0.00045  |
| <i>AC090409.1</i>  | ENSG00000267279 | 18 | 61585746 | 61607006 | 1.545869 | 0.787262208-3.035469113 | 0.2057989 | 1.48575096 | 2.89E-09 | 0.580217 | 0.000173 |
| <i>AC036176.1</i>  | ENSG00000267390 | 18 | 63367328 | 63381629 | 1.014034 | 0.91211801-1.12733817   | 0.796499  | -0.9415269 | 4.49E-08 | -0.7047  | 1.22E-08 |
| <i>AC023090.1</i>  | ENSG00000267015 | 18 | 79340258 | 79343972 | 1.064962 | 0.983861208-1.152748158 | 0.1193832 | 5.12578248 | 3.79E-17 | 1.849857 | 5.25E-07 |
| <i>RBFADN*</i>     | ENSG00000261126 | 18 | 80046900 | 80095482 | 2.829557 | 1.179592987-6.787420442 | 0.0198084 | 0.90206553 | 4.60E-07 | 0.515232 | 4.49E-05 |
| <i>AC006273.1</i>  | ENSG00000272473 | 19 | 781002   | 781862   | 0.977235 | 0.838222365-1.13930212  | 0.7686508 | 1.2934012  | 5.72E-05 | 1.119675 | 8.51E-08 |



|             |                 |    |          |          |          |                         |           |            |          |          |          |
|-------------|-----------------|----|----------|----------|----------|-------------------------|-----------|------------|----------|----------|----------|
| LINC01836   | ENSG00000267530 | 19 | 782755   | 786092   | 1.011853 | 0.882512459-1.160148807 | 0.8659069 | 1.16062096 | 3.36E-05 | 0.957921 | 1.55E-06 |
| LINC01775   | ENSG00000267201 | 19 | 2458935  | 2462185  | 3.228288 | 0.560640788-18.58916756 | 0.1894891 | 2.38656083 | 3.32E-10 | 0.68266  | 0.000923 |
| AC006538.1* | ENSG00000261342 | 19 | 2727743  | 2729327  | 1.913743 | 1.144497749-3.200015373 | 0.0133417 | 2.388644   | 1.52E-18 | 0.667762 | 0.000206 |
| AC010336.2  | ENSG00000260500 | 19 | 7918652  | 7919157  | 0.847802 | 0.598016524-1.201920443 | 0.3538428 | -1.1778809 | 5.17E-06 | -0.97959 | 2.21E-07 |
| AC011447.3  | ENSG00000267383 | 19 | 20122569 | 20321305 | 3.475246 | 0.742837592-16.25837833 | 0.1135722 | 1.52168262 | 3.77E-08 | 0.903128 | 4.13E-07 |
| AC010615.2* | ENSG00000268119 | 19 | 21444241 | 21463908 | 1.769526 | 1.061586071-2.94957148  | 0.0285812 | 2.46171478 | 4.49E-14 | 0.960384 | 3.19E-05 |
| AC006504.1  | ENSG00000261770 | 19 | 27757184 | 27760849 | 6.278483 | 0.467432844-84.331576   | 0.1657007 | 0.80812082 | 0.000126 | 0.70049  | 2.37E-07 |
| AC006504.7* | ENSG00000281468 | 19 | 27802838 | 27803472 | 1.365759 | 1.06328862-1.754271444  | 0.0146706 | 1.146101   | 5.12E-10 | 0.620265 | 3.62E-07 |
| AC007773.1  | ENSG00000267213 | 19 | 32390050 | 32405560 | 1.030051 | 0.90950929-1.166569332  | 0.6410198 | 1.72150138 | 9.34E-15 | 0.505729 | 0.000533 |
| AC020907.4  | ENSG00000271032 | 19 | 35014961 | 35025335 | 1.326602 | 0.993434229-1.771503494 | 0.0554516 | 1.70683218 | 4.22E-10 | 0.67594  | 4.46E-05 |
| AC092296.2  | ENSG00000267053 | 19 | 36304564 | 36321274 | 4.333985 | 0.675250092-27.81699301 | 0.1221043 | 2.49501786 | 7.70E-12 | 0.973084 | 4.12E-06 |
| LINC00665   | ENSG00000232677 | 19 | 36313067 | 36331770 | 1.084013 | 0.980084889-1.198960943 | 0.1167017 | 2.79937129 | 5.30E-25 | 0.994308 | 7.15E-07 |
| AC074138.1  | ENSG00000276071 | 19 | 36668102 | 36669404 | 1.080642 | 0.106591945-10.95567664 | 0.9476771 | 1.98880199 | 9.27E-11 | 0.848545 | 3.13E-08 |
| AC020928.1  | ENSG00000267260 | 19 | 36773112 | 36777078 | 1.12767  | 0.798534196-1.592467756 | 0.4950238 | 2.65442072 | 4.91E-11 | 1.582744 | 1.45E-10 |
| AC016590.1  | ENSG00000267605 | 19 | 37235507 | 37304395 | 2.888348 | 0.380428179-21.92937427 | 0.3051113 | 2.30444156 | 8.22E-09 | 1.077744 | 5.64E-07 |
| LINC01535   | ENSG00000226686 | 19 | 37251885 | 37265535 | 0.971267 | 0.484217739-1.948213139 | 0.9345744 | 3.5382071  | 6.10E-21 | 1.396492 | 7.16E-10 |
| AC022148.1  | ENSG00000180458 | 19 | 37545470 | 37549171 | 8.719968 | 0.234454813-324.3176754 | 0.2404817 | 2.0560834  | 2.91E-05 | 1.046739 | 0.000619 |
| AC005393.1  | ENSG00000276445 | 19 | 39812972 | 39813555 | 1.047398 | 0.784406001-1.398563475 | 0.7535892 | 2.24074271 | 6.03E-15 | 0.840169 | 3.36E-08 |
| LINC01480   | ENSG00000270164 | 19 | 41535183 | 41536904 | 0.976899 | 0.905191187-1.054288019 | 0.5479357 | 2.25207697 | 8.55E-12 | 0.956913 | 3.72E-05 |
| AC006213.3  | ENSG00000267191 | 19 | 43901909 | 43927767 | 1.06319  | 0.822875964-1.373685129 | 0.6392781 | 1.95081959 | 6.49E-08 | 0.964898 | 7.23E-05 |

## Supplementary Material

|                        |                     |    |          |          |              |                             |               |                |              |              |              |
|------------------------|---------------------|----|----------|----------|--------------|-----------------------------|---------------|----------------|--------------|--------------|--------------|
| <i>AC006213.4</i><br>* | ENSG000002778<br>06 | 19 | 43976815 | 43977448 | 1.22088<br>8 | 1.010522772-<br>1.475045459 | 0.038597<br>4 | 1.0509604<br>9 | 3.76E-<br>07 | 0.51092<br>8 | 0.00052<br>3 |
| <i>AC006213.5</i>      | ENSG000002784<br>92 | 19 | 43978376 | 43978663 | 1.42009<br>9 | 0.948638131-<br>2.125870756 | 0.088415<br>8 | 1.1688803<br>3 | 6.19E-<br>05 | 0.64965<br>5 | 0.00053<br>7 |
| <i>AC021092.1</i>      | ENSG000001860<br>19 | 19 | 44103007 | 44113183 | 1.40416<br>3 | 0.278780441-<br>7.072492649 | 0.680710<br>1 | 1.8857567<br>5 | 3.90E-<br>09 | 1.32982<br>1 | 1.98E-<br>12 |
| <i>AC022150.4</i>      | ENSG000002698<br>25 | 19 | 52650437 | 52653284 | 0.55235<br>9 | 0.195698299-<br>1.559034536 | 0.262216<br>4 | 1.5611896      | 7.48E-<br>07 | 0.82672<br>7 | 0.00026<br>4 |
| <i>AC005261.2</i>      | ENSG000002686<br>78 | 19 | 57350848 | 57352012 | 1.07280<br>9 | 0.990760595-<br>1.161652236 | 0.083398<br>1 | 1.0137512<br>6 | 0.00093<br>6 | 0.86247<br>2 | 2.46E-<br>06 |
| <i>AC004076.2</i>      | ENSG000002764<br>49 | 19 | 57449689 | 57453011 | 3.13285<br>2 | 0.727111495-<br>13.49828904 | 0.125438      | 1.3799478<br>8 | 1.97E-<br>12 | 0.69157<br>7 | 3.16E-<br>08 |
| <i>AC008969.1</i>      | ENSG000001765<br>93 | 19 | 58002061 | 58011232 | 1.78319<br>3 | 0.606604383-<br>5.241931244 | 0.293097<br>7 | 0.8057204<br>3 | 1.75E-<br>06 | 0.61792<br>4 | 1.98E-<br>07 |
| <i>AC020915.2</i>      | ENSG000002685<br>16 | 19 | 58257270 | 58278808 | 0.97035<br>1 | 0.530924298-<br>1.773476373 | 0.922075<br>3 | 1.5234659<br>4 | 1.00E-<br>09 | 0.63769<br>8 | 1.53E-<br>05 |
| <i>LINC02560</i>       | ENSG000002683<br>07 | 19 | 58400221 | 58400679 | 1.17895<br>1 | 0.335066508-<br>4.148211046 | 0.797583<br>4 | 1.9851536<br>1 | 4.46E-<br>05 | 1.17823<br>8 | 5.27E-<br>05 |
| <i>AL031665.1</i>      | ENSG000002742<br>69 | 20 | 1186092  | 1207036  | 1.36376<br>1 | 0.952215697-<br>1.953175403 | 0.090493<br>1 | 2.1172476      | 3.15E-<br>06 | 1.01304<br>5 | 0.00011      |
| <i>AL117335.1</i>      | ENSG000002766<br>49 | 20 | 1888128  | 1894374  | 1.18563<br>6 | 0.822491936-<br>1.709114085 | 0.361442<br>6 | 1.5735125<br>6 | 1.43E-<br>09 | 1.25855<br>2 | 1.60E-<br>13 |
| <i>AL109976.1</i>      | ENSG000002772<br>87 | 20 | 3239705  | 3245382  | 1.12979<br>3 | 0.3364849-3.793429937       | 0.843459<br>8 | 2.0896215<br>3 | 2.45E-<br>11 | 0.76894<br>9 | 0.00020<br>3 |
| <i>AL118505.1</i>      | ENSG000002781<br>92 | 20 | 6065966  | 6067897  | 0.96077<br>2 | 0.349442779-<br>2.641584713 | 0.938185<br>7 | 2.5441488<br>6 | 3.69E-<br>10 | 1.41525<br>8 | 5.48E-<br>08 |
| <i>AL354824.2</i>      | ENSG000002324<br>48 | 20 | 10172701 | 10186740 | 4.27260<br>6 | 0.960366159-<br>19.00854752 | 0.056538<br>4 | 1.5885382<br>3 | 0.00061<br>8 | 0.96840<br>1 | 0.00048<br>3 |
| <i>AL121772.3</i>      | ENSG000002769<br>52 | 20 | 25284915 | 25285588 | 1.22400<br>3 | 0.465279955-<br>3.219963377 | 0.682115<br>4 | 1.6440464      | 1.06E-<br>11 | 0.52185<br>5 | 0.00018<br>7 |
| <i>FAM182B</i>         | ENSG000001751<br>70 | 20 | 25762384 | 25868225 | 1.15580<br>7 | 0.331285313-<br>4.032442803 | 0.820332<br>5 | 2.1129200<br>3 | 9.91E-<br>14 | 0.84500<br>6 | 3.22E-<br>06 |
| <i>AL117382.2</i>      | ENSG000002333<br>76 | 20 | 44389624 | 44391537 | 0.68652<br>4 | 0.463908278-<br>1.015967741 | 0.060006<br>2 | 1.0785341<br>2 | 0.00034<br>4 | -<br>0.85057 | 7.14E-<br>05 |
| <i>AL031055.1</i>      | ENSG000002717<br>84 | 20 | 46689659 | 46690289 | 1.20380<br>1 | 0.728821717-<br>1.988327591 | 0.468782<br>8 | -<br>0.9299595 | 5.51E-<br>07 | -<br>0.74441 | 3.27E-<br>08 |
| <i>LINC01754</i>       | ENSG000002245<br>65 | 20 | 47391925 | 47412327 | 0.92184      | 0.597667672-<br>1.421842317 | 0.712803<br>2 | 1.8707187<br>9 | 1.47E-<br>06 | 1.03359<br>4 | 7.59E-<br>05 |

|                         |                     |    |          |          |              |                             |               |                |              |              |              |
|-------------------------|---------------------|----|----------|----------|--------------|-----------------------------|---------------|----------------|--------------|--------------|--------------|
| <i>LINC00494</i>        | ENSG000002356<br>21 | 20 | 48359884 | 48370636 | 1.10978<br>4 | 0.94350233-<br>1.305370691  | 0.208482      | 2.9335348<br>7 | 6.36E-<br>09 | 1.86813<br>2 | 3.87E-<br>07 |
| <i>ZFAS1</i>            | ENSG000001774<br>10 | 20 | 49278178 | 49299600 | 1.00390<br>1 | 0.994257892-<br>1.013636833 | 0.429204<br>2 | 0.9783937<br>8 | 6.79E-<br>10 | 0.50077<br>3 | 2.18E-<br>05 |
| <i>LINC01711</i>        | ENSG000002689<br>41 | 20 | 58634772 | 58635738 | 2.28347<br>5 | 0.803670351-<br>6.48805799  | 0.121203<br>8 | 2.6477471<br>7 | 2.87E-<br>06 | 1.40353<br>1 | 5.82E-<br>05 |
| <i>AJ009632.2</i>       | ENSG000002294<br>25 | 21 | 15368966 | 15627342 | 0.94514<br>7 | 0.857639783-<br>1.041581831 | 0.255083<br>6 | 1.5229958<br>9 | 5.34E-<br>05 | -<br>1.09558 | 4.92E-<br>05 |
| <i>MIR99AHG</i>         | ENSG000002153<br>86 | 21 | 15928296 | 16645467 | 1.00708<br>5 | 0.640538677-<br>1.583386369 | 0.975604<br>9 | -<br>0.8752107 | 2.46E-<br>05 | -<br>0.53501 | 0.00068<br>9 |
| <i>LINC01549</i>        | ENSG000002325<br>60 | 21 | 17438821 | 17450104 | 0.88617<br>7 | 0.782075399-<br>1.004135338 | 0.058060<br>8 | 2.9966018<br>1 | 3.26E-<br>14 | 1.31447<br>8 | 8.49E-<br>06 |
| <i>AP000472.1</i>       | ENSG000002270<br>75 | 21 | 21933315 | 21975681 | 1.11994<br>7 | 0.435208576-<br>2.882022143 | 0.814288<br>9 | -<br>1.4494686 | 9.28E-<br>05 | -<br>1.26922 | 5.85E-<br>06 |
| <i>AP001596.1</i>       | ENSG000002326<br>92 | 21 | 26378552 | 26471698 | 0.17836<br>8 | 0.001004099-<br>31.68532648 | 0.514203<br>2 | 1.9032073<br>1 | 2.93E-<br>05 | 1.19206<br>5 | 5.61E-<br>06 |
| <i>AP000695.2</i>       | ENSG000002338<br>18 | 21 | 36445731 | 36532408 | 0.91972<br>6 | 0.650371424-<br>1.30063418  | 0.636007<br>5 | 1.3328334<br>3 | 6.37E-<br>07 | 0.76849<br>2 | 6.56E-<br>06 |
| <i>DSCR9*</i>           | ENSG000002303<br>66 | 21 | 37208503 | 37221736 | 152.029<br>2 | 1.519381802-<br>15212.03525 | 0.032519<br>1 | 1.5660820<br>2 | 1.37E-<br>08 | 0.59023<br>3 | 5.69E-<br>05 |
| <i>AP001432.1</i>       | ENSG000002425<br>53 | 21 | 37221419 | 37237744 | 1.80221<br>2 | 0.764016069-<br>4.25117709  | 0.178552<br>3 | 1.8218337<br>9 | 7.43E-<br>10 | 0.71441<br>6 | 9.28E-<br>06 |
| <i>AP001626.1</i>       | ENSG000002350<br>23 | 21 | 42648271 | 42651244 | 1.20701<br>5 | 0.235652597-<br>6.182343362 | 0.821398<br>4 | 1.8600548<br>5 | 7.47E-<br>05 | 1.11797<br>7 | 0.00046<br>4 |
| <i>AP001628.1</i>       | ENSG000002252<br>18 | 21 | 42831040 | 42836477 | 2.02870<br>1 | 0.806088627-<br>5.105675753 | 0.133044<br>5 | 1.6502426      | 6.92E-<br>07 | 0.64381<br>6 | 0.00012<br>4 |
| <i>AP001065.3</i>       | ENSG000002742<br>25 | 21 | 44477850 | 44478493 | 1.03171<br>6 | 0.931475647-<br>1.142744104 | 0.549342<br>1 | -<br>1.0523478 | 2.52E-<br>05 | -<br>1.27501 | 2.25E-<br>13 |
| <i>LINC00205*</i>       | ENSG000002237<br>68 | 21 | 45288050 | 45297806 | 1.17521<br>9 | 1.021455635-<br>1.35212849  | 0.024027<br>9 | 1.5502036<br>2 | 9.89E-<br>24 | 0.74484<br>8 | 4.90E-<br>13 |
| <i>LINC00316</i>        | ENSG000002376<br>64 | 21 | 45338590 | 45341990 | 0.95994<br>9 | 0.314121712-<br>2.933583359 | 0.942828<br>1 | 2.3852687<br>8 | 1.23E-<br>05 | 1.30934<br>1 | 0.00011<br>2 |
| <i>LINC01694</i>        | ENSG000002339<br>22 | 21 | 45593654 | 45603088 | 1.42898<br>1 | 0.968168943-<br>2.109122294 | 0.072318<br>8 | 2.7651956<br>1 | 4.68E-<br>11 | 1.52575<br>8 | 3.51E-<br>07 |
| <i>AP001469.3<br/>*</i> | ENSG000002394<br>15 | 21 | 46251549 | 46254133 | 1.82654<br>3 | 1.141534718-<br>2.922608599 | 0.012007<br>6 | 1.9610556<br>6 | 1.03E-<br>24 | 0.53646<br>5 | 5.11E-<br>05 |
| <i>DGCR9</i>            | ENSG000002730<br>32 | 22 | 18970525 | 19031242 | 0.90586<br>4 | 0.443671862-<br>1.849539622 | 0.786030<br>8 | 2.0776041<br>3 | 2.23E-<br>12 | 0.78389<br>8 | 0.00016<br>3 |
| <i>AL022324.3</i>       | ENSG000002729<br>42 | 22 | 25434324 | 25435070 | 2.31543<br>9 | 0.499402703-<br>10.73533643 | 0.283369<br>2 | 2.5517794<br>3 | 2.18E-<br>06 | 1.21784<br>9 | 0.00026<br>6 |

## Supplementary Material

|                   |                     |    |               |               |              |                             |               |                |              |              |              |
|-------------------|---------------------|----|---------------|---------------|--------------|-----------------------------|---------------|----------------|--------------|--------------|--------------|
| <i>AL008721.2</i> | ENSG000002729<br>77 | 22 | 25476218      | 25479971      | 1.79172<br>5 | 0.603493841-<br>5.31948796  | 0.293548<br>6 | 1.2230363<br>1 | 1.19E-<br>09 | 0.66306<br>5 | 9.28E-<br>07 |
| <i>AC004832.5</i> | ENSG000002733<br>50 | 22 | 30420512      | 30420912      | 0.95778<br>2 | 0.772448025-<br>1.187583952 | 0.694231<br>1 | -<br>0.9281883 | 3.73E-<br>05 | -0.7138      | 1.66E-<br>05 |
| <i>AC004832.6</i> | ENSG000002734<br>28 | 22 | 30435544      | 30436247      | 1.93533<br>8 | 0.248561718-<br>15.06882548 | 0.528327<br>8 | -<br>0.8616625 | 0.00015<br>4 | -<br>0.71186 | 3.60E-<br>05 |
| <i>AC005005.3</i> | ENSG000002733<br>87 | 22 | 31082156      | 31083565      | 1.31610<br>1 | 0.764207563-<br>2.266557957 | 0.321997<br>5 | 1.0992590<br>2 | 6.61E-<br>08 | 0.53397<br>5 | 0.00012<br>2 |
| <i>Z97056.1</i>   | ENSG000002286<br>20 | 22 | 38424288      | 38427336      | 1.01843<br>1 | 0.941233204-<br>1.101961194 | 0.649755<br>1 | 1.5381161<br>4 | 4.27E-<br>06 | -<br>0.99677 | 5.45E-<br>05 |
| <i>LINC01315</i>  | ENSG000002298<br>91 | 22 | 42364390      | 42369284      | 1.01662<br>2 | 0.779247368-<br>1.326306645 | 0.903286<br>1 | 1.3778739<br>2 | 1.69E-<br>10 | 0.58864      | 0.00013<br>2 |
| <i>FIRRE*</i>     | ENSG000002134<br>68 | X  | 13168877<br>9 | 13183086<br>2 | 3.21562<br>3 | 1.023169703-<br>10.10607467 | 0.045590<br>1 | 3.2726556<br>8 | 3.51E-<br>19 | 0.79858<br>1 | 0.00035<br>5 |
| <i>LINC00632</i>  | ENSG000002039<br>30 | X  | 14070956<br>2 | 14079321<br>5 | 1.83397<br>3 | 1.198149366-<br>2.80720913  | 0.005233<br>9 | 2.6643238<br>4 | 2.91E-<br>05 | 2.00421<br>1 | 1.02E-<br>06 |
| <i>AC244090.3</i> | ENSG000002617<br>73 | X  | 15451784<br>0 | 15451863<br>1 | 6.42441<br>9 | 0.660925747-<br>62.44750699 | 0.108918<br>5 | 1.6084942<br>9 | 7.26E-<br>05 | 0.82607<br>8 | 0.00029<br>3 |

---
